## 1 Association mapping of inflammatory bowel disease loci to single variant resolution

2 Hailiang Huang<sup>1,2,\*§</sup>, Ming Fang<sup>3,4,\*</sup>, Luke Jostins<sup>5,6,\*</sup>, Maša Umićević Mirkov<sup>7</sup>, Gabrielle  
3 Boucher<sup>8</sup>, Carl A Anderson<sup>7</sup>, Vibeke Andersen<sup>9,10</sup>, Isabelle Cleynen<sup>11</sup>, Adrian Cortes<sup>5</sup>,  
4 François Crins<sup>3,4</sup>, Mauro D'Amato<sup>12,13</sup>, Valérie Deffontaine<sup>3,4</sup>, Julia Dimitrieva<sup>3,4</sup>, Elisa  
5 Docampo<sup>3,4</sup>, Mahmoud Elansary<sup>3,4</sup>, Kyle Kai-How Farh<sup>1,2,14</sup>, Andre Franke<sup>15</sup>, Ann-  
6 Stephan Gori<sup>3,4</sup>, Philippe Goyette<sup>8</sup>, Jonas Halfvarson<sup>16</sup>, Talin Haritunians<sup>17</sup>, Jo Knight<sup>18</sup>,  
7 Ian C Lawrance<sup>19,20</sup>, Charlie W Lees<sup>21</sup>, Edouard Louis<sup>22</sup>, Rob Mariman<sup>3,4</sup>, Theo  
8 Meuwissen<sup>3,4</sup>, Myriam Mni<sup>3,4</sup>, Yukihide Momozawa<sup>3,4,23</sup>, Miles Parkes<sup>24</sup>, Sarah L  
9 Spain<sup>25,26</sup>, Emilie Théâtre<sup>3,4</sup>, Gosia Trynka<sup>7</sup>, Jack Satsangi<sup>21</sup>, Suzanne van Sommeren<sup>27</sup>,  
10 Severine Vermeire<sup>11,28</sup>, Ramnik J Xavier<sup>2,29</sup>, International IBD Genetics Consortium†,  
11 Rinse K Weersma<sup>27</sup>, Richard H Duerr<sup>30,31</sup>, Christopher G Mathew<sup>25,32</sup>, John D Rioux<sup>8,33</sup>,  
12 Dermot PB McGovern<sup>17</sup>, Judy H Cho<sup>34</sup>, Michel Georges<sup>3,4</sup>§, Mark J Daly<sup>1,2</sup>§, Jeffrey C  
13 Barrett<sup>7</sup>§

14 <sup>1</sup>Analytic and Translational Genetics Unit, Massachusetts General Hospital, Harvard Medical School,  
15 Boston, Massachusetts, USA. <sup>2</sup>Broad Institute of MIT and Harvard, Cambridge, Massachusetts, USA. <sup>3</sup>Unit  
16 of Animal Genomics, Groupe Interdisciplinaire de Génoprotéomique Appliquée (GIGA-R) Research  
17 Center, University of Liège, Liège, Belgium. <sup>4</sup>Faculty of Veterinary Medicine, University of Liège, Liège,  
18 Belgium. <sup>5</sup>Wellcome Trust Centre for Human Genetics, University of Oxford, Headington, UK. <sup>6</sup>Christ  
19 Church, University of Oxford, St Aldates, UK. <sup>7</sup>Wellcome Trust Sanger Institute, Hinxton (Cambridge),  
20 UK. <sup>8</sup>Research Center, Montreal Heart Institute, Montréal, Québec, Canada. <sup>9</sup>Medical Department, Viborg  
21 Regional Hospital, Viborg, Denmark. <sup>10</sup>Organ Center, Hospital of Southern Jutland Aabenraa, Aabenraa,  
22 Denmark. <sup>11</sup>Department of Clinical and experimental medicine, Translational Research in GastroIntestinal  
23 Disorders (TARGID), Katholieke Universiteit (KU) Leuven, Leuven, Belgium. <sup>12</sup>Department of  
24 Biosciences and Nutrition, Karolinska Institutet, Stockholm, Sweden. <sup>13</sup>BioCruces Health Research  
25 Institute and IKERBASQUE, Basque Foundation for Science, Bilbao, Spain. <sup>14</sup>Illumina, San Diego,  
26 California, USA. <sup>15</sup>Institute of Clinical Molecular Biology, Christian-Albrechts-University of Kiel, Kiel,  
27 Germany. <sup>16</sup>Department of Gastroenterology, Faculty of Medicine and Health, Örebro University, Örebro,  
28 Sweden. <sup>17</sup>F.Widjaja Foundation Inflammatory Bowel and Immunobiology Research Institute, Cedars-Sinai  
29 Medical Center, Los Angeles, California, USA. <sup>18</sup>Campbell Family Mental Health Research Institute,  
30 Centre for Addiction and Mental Health, Toronto, Ontario, Canada. <sup>19</sup>Centre for Inflammatory Bowel  
31 Diseases, Saint John of God Hospital, Subiaco, WA, Australia. <sup>20</sup>Harry Perkins Institute for Medical  
32 Research, School of Medicine and Pharmacology, University of Western Australia, Murdoch, WA,  
33 Australia. <sup>21</sup>Gastrointestinal Unit, Wester General Hospital University of Edinburgh, Edinburgh, UK.  
34 <sup>22</sup>Division of Gastroenterology, Centre Hospitalier Universitaire (CHU) de Liège, Liège, Belgium.  
35 <sup>23</sup>Laboratory for Genotyping Development, Center for Integrative Medical Sciences, RIKEN, Yokohama,  
36 Japan. <sup>24</sup>Inflammatory Bowel Disease Research Group, Addenbrooke's Hospital, Cambridge, UK.  
37 <sup>25</sup>Department of Medical and Molecular Genetics, King's College London, London, UK. <sup>26</sup>Centre for  
38 Therapeutic Target Validation, Wellcome Trust Genome Campus, Hinxton (Cambridge), UK. <sup>27</sup>Department  
39 of Gastroenterology and Hepatology, University Medical Center Groningen, Groningen, The Netherlands.  
40 <sup>28</sup>Division of Gastroenterology, University Hospital Gasthuisberg, Leuven, Belgium. <sup>29</sup>Gastroenterology  
41 Unit, Massachusetts General Hospital, Harvard Medical School, Boston, Massachusetts, USA. <sup>30</sup>Division  
42 of Gastroenterology, Hepatology and Nutrition, Department of Medicine, University of Pittsburgh School  
43 of Medicine, Pittsburgh, Pennsylvania, USA. <sup>31</sup>Department of Human Genetics, University of Pittsburgh  
44 Graduate School of Public Health, Pittsburgh, Pennsylvania, USA. <sup>32</sup>Sydney Brenner Institute for  
45 Molecular Bioscience, University of the Witwatersrand, Johannesburg, South Africa. <sup>33</sup>Faculté de  
46 Médecine, Université de Montréal, Montréal, Québec, Canada. <sup>34</sup>Department of Genetics, Yale School of  
47 Medicine, New Haven, Connecticut, USA.

48 \*These authors contributed equally to this work.

49 §These authors contributed equally to this work (corresponding authors). E-mails:

50 [hhuang@atgu.mgh.harvard.edu](mailto:hhuang@atgu.mgh.harvard.edu) (H.H.); [michel.georges@ulg.ac.be](mailto:michel.georges@ulg.ac.be) (M.G.); [mjdaly@atgu.mgh.harvard.edu](mailto:mjdaly@atgu.mgh.harvard.edu)  
51 (M.J.D.) and [jb26@sanger.ac.uk](mailto:jb26@sanger.ac.uk) (J.C.B.)

52 †A full list of members and affiliations appears at the end of the paper.

53 **Summary (150 words)**

54 Inflammatory bowel disease (IBD) is a chronic gastrointestinal inflammatory disorder  
55 that affects millions worldwide. Genome-wide association studies (GWAS) have  
56 identified 200 IBD-associated loci, but few have been conclusively resolved to specific  
57 functional variants. Here we report fine-mapping of 94 IBD loci using high-density  
58 genotyping in 67,852 individuals. Of the 139 independent associations identified in these  
59 regions, 18 were pinpointed to a single causal variant with >95% certainty, and an  
60 additional 27 associations to a single variant with >50% certainty. These 45 variants are  
61 significantly enriched for protein-coding changes (n=13), direct disruption of  
62 transcription factor binding sites (n=3) and tissue specific epigenetic marks (n=10), with  
63 the latter category showing enrichment in specific immune cells among associations  
64 stronger in CD and gut mucosa among associations stronger in UC. The results of this  
65 study suggest that high-resolution, fine-mapping in large samples can convert many  
66 GWAS discoveries into statistically convincing causal variants, providing a powerful  
67 substrate for experimental elucidation of disease mechanisms.

68

69 Inflammatory bowel disease (IBD) is a chronic, debilitating disorder of the  
70 gastrointestinal tract with peak onset in adolescence and early adulthood. More than 1.4  
71 million people are affected in the USA alone<sup>1</sup>, with an estimated direct healthcare cost of  
72 \$6.3 billion/year. IBD affects millions worldwide with a rising prevalence, particularly in  
73 pediatric and non-European ancestry populations<sup>2</sup>. IBD is comprised of two etiologically  
74 related subtypes, ulcerative colitis (UC) and Crohn's disease (CD), which have distinct  
75 presentations and treatment courses. To date, 200 genomic loci have been associated with  
76 IBD<sup>3,4</sup>, but only a handful have been conclusively ascribed to a specific causal variant  
77 with direct insight into the underlying disease biology. This scenario is common to all  
78 genetically complex diseases, where the pace of identifying associated loci outstrips that  
79 of defining specific molecular mechanisms and extracting biological insight from each  
80 association.

81       The widespread correlation structure of the human genome (known as linkage  
82 disequilibrium, or LD) often results in similar evidence for association among many  
83 nearby variants. However, unless LD is perfect ( $r^2 = 1$ ), it is possible, with sufficiently  
84 large sample size, to statistically resolve causal variants from neighbors even at high  
85 levels of correlation (Extended Data Figure 1 and van de Bunt *et al.*<sup>5</sup>). Novel statistical  
86 approaches applied to very large datasets have begun to address this problem<sup>6</sup> but also  
87 require that the highly correlated variants are directly genotyped or imputed with  
88 certainty. Truly high-resolution mapping data, when combined with increasingly  
89 sophisticated and comprehensive public databases annotating the putative protein-coding  
90 and regulatory function of DNA variants, are likely to reveal novel insights into disease  
91 pathogenesis<sup>7-9</sup> and the mechanistic involvement of disease-associated variants.

92

### 93 **Genetic architecture of IBD associated loci**

94 As part of a large collaborative effort led by the International IBD Genetics Consortium  
95 (IIBDGC), 67,852 study subjects of European ancestry, including 33,595 IBD (18,967  
96 CD and 14,628 UC) and 34,257 healthy controls were genotyped using the Illumina™  
97 (San Diego, CA, USA) ImmunoChip. This custom genotyping array was designed to  
98 include all known variants from European individuals in the February 2010 release of the  
99 1000 Genomes Project<sup>10,11</sup> in 186 high-density regions known to be associated to one or  
100 more of 12 immune-mediated diseases<sup>12</sup>. We evaluated ninety-seven of these regions  
101 previously associated with IBD<sup>3</sup> and containing one or more associated variants ( $p < 10^{-6}$ )  
102 in this data set. The major histocompatibility complex was excluded from these analyses  
103 as fine-mapping has been reported elsewhere<sup>13</sup>. Because fine-mapping uses subtle  
104 differences in strength of association between tightly correlated variants to infer which is  
105 most likely to be causal, it is particularly sensitive to data quality. We therefore  
106 performed stringent quality control (QC) to remove genotyping errors and batch effects,  
107 including manual cluster plot inspection for 905 variants (Methods). After QC, we  
108 imputed this dataset using the 1000 Genomes reference panel (December 2013,  
109 downloaded from IMPUTE2<sup>14,15</sup> website) to fill in missing variants or genotype data  
110 dropped in chip design or QC (Figure 1a).

111 We applied three complementary Bayesian fine-mapping methods that used  
112 different priors and model selection strategies both to identify independent association  
113 signals within a region (Supplementary Methods), and to assign a posterior probability of  
114 causality to each variant (Figure 1a). For each independent association signal, we sorted

115 all variants by the posterior probability of association, and added variants to the ‘credible  
116 set’ of associated variants until the sum of their posterior probability exceeded 95% –  
117 that is, the credible set contains the minimum list of DNA variants that are >95% likely to  
118 contain the causal variant (Figure 1b). These sets ranged in size from one to > 400  
119 variants. We merged these results (Methods) and subsequently focused (Figure 1a) only  
120 on signals where an overlapping credible set of variants was identified by at least two of  
121 the three methods and all variants were either directly genotyped or well imputed  
122 (Methods). Fluorescent signal intensity cluster plots were manually reviewed for all  
123 variants in credible sets with ten or fewer variants, and a second round of imputation and  
124 analysis was performed if any genotypes were removed based on this review.

125 In 3 out of 97 regions, a consistent credible set could not be identified; when  
126 multiple independent effects exist in a region with several highly correlated signals,  
127 multiple distinct fine-mapping solutions may not be distinguishable (Supplementary  
128 Notes). Sixty-eight of the remaining 94 regions contain a single credible set, while 26  
129 harbored two or more independent association signals, for a total of 139 independent  
130 associations defined across the 94 regions (Figure 2a). Only *IL23R* and *NOD2* (both  
131 previously established to contain multiple associated protein-coding variants<sup>16</sup>), contain  
132 more than three independent signals. Consistent with previous reports<sup>3</sup>, the vast majority  
133 of signals are associated with both CD and UC. However, many of these have  
134 significantly stronger association with one subtype than the other. For the purposes of  
135 enrichment analyses below, we compare 79 signals that are more strongly associated with  
136 CD to 23 signals that are more strongly associated with UC (the remaining 37 are equally  
137 associated with both subtypes) (“list of credible sets” sheet, Supplementary Table 1).

138 Using a restricted maximum likelihood mixed model approach<sup>17</sup>, we evaluated the  
139 proportion of total variance in disease risk attributed to these 94 regions and how much of  
140 that is explained by the 139 specific associations. We estimated that 25% of CD risk was  
141 explained by the specific associations described here, out of a total of 28% explained by  
142 these loci (the corresponding numbers for UC are 17% out of 22%). This indicates that  
143 our credible sets capture most of the IBD genetic risk at these loci. The single strongest  
144 signals in each region contribute 76% of this variance explained and the remaining  
145 associations contribute 24% (Extended Data Figure 2b), highlighting the importance of  
146 secondary and tertiary associations in the articulation of GWAS results<sup>13,18</sup>.

147

#### 148 **Associations mapped to a single variant**

149 For 18 independent signals, the 95% credible set consisted of a single variant (hereafter  
150 referred to as ‘single variant credible sets’) and for 24 others, the credible set consisted of  
151 two to five variants (Figure 2b). The single variant credible sets included five previously  
152 reported coding variants: three in *NOD2* (fs1007insC, R702W, G908R), a rare protective  
153 allele in *IL23R* (V362I) and a splice variant in *CARD9* (c.IVS11+1G>C)<sup>16,19</sup>. The  
154 remaining single variant credible sets were comprised of three missense variants (I170V  
155 in *SMAD3*, I923V in *IFIH1* and N289S in *NOD2*), four intronic variants (in *IL2RA*,  
156 *LRRK2*, *NOD2* and *RTEL1/TNFRSF6B*) and six intergenic variants (located 3.7kb  
157 downstream of *GPR35*; 3.9kb upstream of *PRDMI*; within a EP300 binding site 39.9 kb  
158 upstream of *IKZF1*; 500 bp before the transcription start site of *JAK2*; 9.4kb upstream of  
159 *NKX2-3*; and 3.5kb downstream from *HNF4A*) (Table 1). A customizable browser  
160 (<https://atgu.shinyapps.io/Finemapping>) enabling review of the detailed fine-mapping

161 results in each region along with all annotations discussed below has been prepared. Of  
162 note, while physical proximity does not guarantee functional relevance, the credible set of  
163 variants for 29 associated loci now resides within 50 kb of only a single gene – improved  
164 from only 3 so refined using an earlier HapMap-based definition. Using the same  
165 definitions, the total number of potential candidate genes was reduced from 669 to 331.  
166 Examples of IBD candidate genes clearly prioritized in our data are described in the  
167 Supplementary Box.

168

### 169 **Sequence-level consequences of associated variants – protein coding variation**

170 We first annotated the possible functional consequences of the IBD variants by their  
171 effect on the amino acid sequences of proteins. Thirteen out of 45 variants that have  
172 >50% posterior probability are non-synonymous (Table 1 and Figure 2c), an 18-fold  
173 enrichment ( $p\text{-value}=2\times 10^{-13}$ , Fisher's exact test) relative to randomly drawn variants in  
174 our regions. By contrast, only one variant with >50% probability is synonymous  
175 ( $p=0.42$ ). All common coding variants previously reported to affect IBD risk are  
176 included in a 95% credible set including: *IL23R* (R381Q, V362I and G149R); *CARD9*  
177 (c.IVS11+1G>C and S12N); *NOD2* (S431L, R702W, V793M, N852S and G908R,  
178 fs1007insC); *ATG16L1* (T300A); *PTPN22* (R620W); and *FUT2* (W154X). While this  
179 enrichment of coding variation (Figure 3a) provides assurance about the accuracy of our  
180 approach, it does not suggest that 30% of all associations are caused by coding variants;  
181 rather, it is almost certainly the case that associated coding variants have stronger effect  
182 sizes, making them more amenable to fine mapping.

183

184 **Sequence-level consequences of associated variants – non-coding variation**

185 We next examined the best understood non-coding aspect of DNA sequence: conserved  
186 nucleotides in high confidence binding site motifs of 84 transcription factor (TF)  
187 families<sup>20</sup> (Methods). There was a significant positive correlation between TF motif  
188 disruption and IBD association posterior probability (p-value=0.006, binomial  
189 regression) (Figure 3a), including three variants with >50% probability (two >95%). In  
190 the *RTEL1/TNFRSF6B* region, rs6062496 region is predicted to disrupt a TF binding site  
191 (TFBS) for EBF1 and overlaps DNaseI hypersensitivity clusters. EBF1 is a TF involved  
192 in the maintenance of B cell identity and prevention of alternative fates in committed  
193 cells<sup>21</sup>. The second example, rs74465132, is a low frequency (3.6%) protective variant  
194 that creates a binding site for EP300 less than 40kbp upstream of *IKZF1* (zinc-finger  
195 DNA binding protein). The third notable example of TFBS disruption, although not in a  
196 single variant credible set, is detailed in the Supplementary Box for the association at  
197 *SMAD3*.

198 Recent studies have shown that trait associated variants are enriched for  
199 epigenetic marks highlighting cell type specific regulatory regions<sup>22,23</sup>. We compared our  
200 credible sets with ChIPseq peaks corresponding to chromatin immunoprecipitation with  
201 H3K4me1, H3K4me3 and H3K27ac in 120 adult and fetal tissues, assayed by the NIH  
202 Roadmap Epigenomics Mapping Consortium<sup>24</sup> (Figure 3b). Using a threshold of  
203  $p=1.3 \times 10^{-4}$  (0.05 corrected for 360 tests), we observed significant enrichment of  
204 H3K4me1 in 6 immune cell types and for H3K27ac in 3 gastrointestinal (GI) samples  
205 (sigmoid colon and colonic and rectal mucosa) (Figure 3b and Supplementary Table 2).  
206 Furthermore, the subset of signals that are more strongly associated with CD overlap



207 more with immune cell chromatin peaks, whereas UC signals overlap more with GI  
208 chromatin peaks (Supplementary Table 2).

209         These three chromatin marks are correlated both within tissues (we observe  
210 additional signal in other marks in the tissues described above) and across related tissues.  
211 We therefore defined a set of “core immune peaks” for H3K4me1 and “core GI peaks”  
212 for H3K27ac as the set of overlapping peaks in all enriched immune cell and GI tissue  
213 types, respectively. These two tracks (immune-K4me1 and gut-K27ac) are independently  
214 significant and capture the observed enrichment compared to “control peaks” made up of  
215 the same number of ChIPseq peaks across our 94 regions in non-immune and non-GI  
216 tissues (Figure 3c,d). These two tracks summarize our epigenetic-GWAS overlap signal,  
217 and the combined excess over the baseline suggests that a substantial number of regions,  
218 particularly those not mapped to coding variants, may ultimately be explained by  
219 functional variation in recognizable enhancer/promoter elements.

220

### 221 **Overlap of IBD credible sets with expression QTLs**

222 Variants that change enhancer or promoter activity might precipitate changes in gene  
223 expression, and baseline expression of many genes has been found to be regulated by  
224 genetic variation<sup>25-27</sup>. Indeed, these so-called expression quantitative trait loci (eQTLs)  
225 have been suggested to underlie a large proportion of GWAS associations<sup>25,28</sup>. We  
226 therefore searched for variants that are both in an IBD associated credible set with 50 or  
227 fewer variants and the most significantly associated eQTL variant for a gene in the  
228 GODOT study<sup>29</sup> of peripheral blood mononuclear cells (PBMC) from 2,752 twins.  
229 Sixty-eight of the 76 regions with signals fine-mapped to < 50 variants harbor at least one

230 significant eQTL (defined as influencing expression of a gene within 1 Mb of the region  
231 with a p-value  $< 10^{-5}$ ). Despite this apparent abundance of eQTLs in fine-mapped  
232 regions, only 3 credible sets overlap eQTLs, compared with 3.7 expected by chance  
233 (Methods). Data from a more recent independent study (Westra *et al.*)<sup>30</sup> using PBMCs  
234 from 8,086 individuals did not yield a substantively different outcome, demonstrating a  
235 modest but non-significant enrichment (8 observed overlaps, 4.2 expected by chance,  
236  $p=0.07$ ). Using a more lenient definition of overlap which requires the lead eQTL variant  
237 to be in LD ( $R^2 > 0.4$ ) with an IBD credible set variant increased the number of potential  
238 overlaps but again these numbers were not greater than chance expectation (GODOT:  
239 observed 14, expected 12.2; Westra *et al.*: observed 11, expected 9.1).

240 As PBMCs are a heterogeneous collection of immune cell populations, cell type-  
241 specific signals, or signals corresponding to genes expressed most prominently in non-  
242 immune tissues, may be missed. We therefore tested the enrichment of eQTLs that  
243 overlap credible sets in 5 primary T cell populations (CD4+, CD8+, CD19+, CD14+ and  
244 CD15+), platelets, and 3 distinct intestinal locations (rectum, colon and ileum) isolated  
245 from 350 healthy individuals (ULg dataset, Methods). We observed a significant  
246 enrichment of credible SNP/eQTL overlaps in CD4+ cells and ileum (Extended Table 1):  
247 3 and 2 credible sets overlapped eQTLs, respectively, compared to 0.4 and 0.3 expected  
248 by chance ( $p$ -value=0.007 and 0.025). An enrichment was also observed for the naïve  
249 CD14+ cells from another study<sup>31</sup> (Knight dataset, Extended Data Table 1): eight  
250 overlaps observed compared to 2.7 expected by chance ( $p$ -value=0.005). We did not  
251 observe enrichment of overlaps in stimulated (with interferon or lipopolysaccharide)  
252 CD14+ cells from the same source (Extended Data Table 1).

253 To more deeply investigate eQTL overlaps we applied two colocalization  
254 approaches (one based on permutations, one Bayesian, Methods) to eQTL datasets where  
255 primary genotype and expression data were available (ULg dataset). We confirmed  
256 greater than expected overlap with eQTLs in CD4+ and ileum described above (Figure 4  
257 and Extended Data Table 1). The number of colocalizations in other purified cell  
258 types/tissues was largely indistinguishable from what we expect under the null using  
259 either method, except for moderate enrichment in rectum (4 observed and 1.4 expected,  
260  $p=0.039$ ) and colon (3 observed and 0.8 expected,  $p=0.04$ ). Of these robust  
261 colocalizations, only two correspond to an IBD variant with causal probability  $> 50\%$   
262 (Table 1 and Extended Data Figure 3a).

263

## 264 **Discussion**

265 We have performed fine-mapping of 94 previously reported genetic risk loci for IBD.  
266 Rigorous quality control followed by a integration of three novel fine-mapping methods  
267 was employed to generate a list of genetic variants accounting for 139 independent  
268 associations across these loci. These associations account for more than 80% of the total  
269 variance explained by these loci. Our results substantially improve on previous fine-  
270 mapping efforts using a preset LD threshold (e.g.  $r^2 > 0.6^{32}$ ) (Figure 5) by formally  
271 modeling the posterior probability of association of every variant. Much of this  
272 resolution derives from the very large sample size we employed, because the number of  
273 variants in a credible set significantly decreases with increasing test statistics ( $p$ -value =  
274 0.0069, Extended Data Figure 4). For example, at 10% allele frequency, 31% of signals

275 are fine-mapped to  $\leq 5$  variants – this improves to 53% if the sample size were to double  
276 again.

277         Additionally, the high-density of genotyping also aids in improved resolution.  
278 For instance, the primary association at *IL2RA* has now been mapped to a single variant  
279 associated with CD, rs61839660. This variant was not present in the Hapmap 3 reference  
280 panel and was therefore not reported in earlier studies<sup>3,33</sup> (nearby tagging variants,  
281 rs12722489 and rs12722515, were reported instead). Imputation using the 1000 genomes  
282 reference panel and the largest assembled GWAS dataset<sup>3</sup> did not separate rs61839660  
283 from its neighbors (unpublished results), due to the loss of information in imputation  
284 using the limited reference. Only direct genotyping, available in the immunochip high-  
285 density regions, permitted the conclusive identification of this as the causal variant.

286         Accurate fine-mapping should, in many instances, ultimately point to the same  
287 variant across diseases in shared loci. Among our single-variant credible sets, we fine-  
288 mapped a UC association to a rare missense variant (I923V) in *IFIH1*, which is also  
289 associated with type 1 diabetes (T1D)<sup>34</sup> with an opposite direction of effect  
290 (Supplementary Box). The intronic variant noted above (rs61839660, AF=9%) in *IL2RA*  
291 was also similarly associated with T1D, again with a discordant directional effect<sup>35</sup>  
292 (Supplementary Box). Simultaneous high-resolution fine-mapping in multiple diseases  
293 should therefore better clarify both shared and distinct biology.

294         High-resolution fine-mapping demonstrates that causal variants are significantly  
295 enriched for variants that alter protein coding variants or disrupt transcription factor  
296 binding motifs. Enrichment was also observed in H3K4me1 marks in immune related  
297 cell types and H3K27ac marks in sigmoid colon and rectal mucosal tissues – with CD

298 loci demonstrating a stronger immune signature and UC loci more enriched for gut  
299 tissues. By contrast, overall enrichment of eQTLs is quite modest compared with prior  
300 reports and not seen in excess of chance in our well-refined credible sets. This result  
301 underscores not only the importance of the high-resolution mapping but also the careful  
302 incorporation of the high background rate of eQTLs. It is worth noting that evaluating  
303 the overlap between two distinct mapping results is fundamentally different than  
304 comparing genetic mapping results to fixed genomic features, and depends on both  
305 mappings being well-resolved. While these data strongly challenge the paradigm that  
306 easily surveyed baseline eQTLs explain a large proportion of non-coding GWAS signals,  
307 the modest excesses observed in smaller but cell-specific data sets suggest that much  
308 larger tissue or cell-specific studies (and under the correct stimuli or developmental time  
309 points) will resolve the contribution of eQTLs to GWAS hits.

310         Resolving multiple independent associations may often help target the causal gene  
311 more precisely. For example, the *SMAD3* locus hosts a non-synonymous variant and a  
312 variant disrupting the conserved transcription factor binding site (also overlapping the  
313 H3K27ac marker in gut tissues), unambiguously articulating a role in disease and  
314 providing an allelic series for further experimental inquiry. Similarly, the *TYK2* locus has  
315 been mapped to a non-synonymous variant and a variant disrupting a conserved  
316 transcription factor binding site (Extended Data Figure 5).

317         One-hundred and sixteen associations have been fine-mapped to  $\leq 50$  variants.  
318 Among them, 27 associations contain coding variants, 20 contain variants disrupting  
319 transcription factor binding motifs, and 45 are within histone H3K4me1 or H3K27ac  
320 marked DNA regions. However, 40 non-coding associations were not mapped to any

321 known function (Extended Data Figure 3b) despite extensive efforts to integrate with all  
322 available annotation, epigenetic and eQTL data.

323 The best-resolved associations - 45 variants having >50% posterior probabilities  
324 for being causal (Table 1) – are similarly significantly enriched for variants with known  
325 or presumed function from genome annotation. Of these, 13 variants cause non-  
326 synonymous change in amino acids, 3 disrupt a conserved TF binding motif, 10 are  
327 within histone H3K4me1 or H3K27ac marked DNA regions in disease-relevant tissues,  
328 and 2 co-localize with a significant cis-eQTL (Extended Data Figure 3a).

329 This analysis leaves, however, 21 non-coding variants, all of which have  
330 extremely high probabilities to be causal (5 are in the >95% list), that are not located  
331 within known motifs, annotated elements, nor in any experimentally determined ChIPseq  
332 peaks or eQTL credible sets yet discovered. While we have identified a statistically  
333 compelling set of genuine associations (often intronic or within 10 kb of strong candidate  
334 genes), we can make little inference about function. For example, the single variant  
335 credible set only 500 bp from the transcription start site of JAK2 has no annotation,  
336 eQTL or ChIPseq peak of note. This underscores the incompleteness of our knowledge  
337 regarding the function of non-coding DNA and its role in disease. That the majority of  
338 the best refined non-coding associations have no available annotation is perhaps sobering  
339 with respect to how well we may be able to currently interpret non-coding variation in  
340 medical sequencing efforts. It does suggest, however, that detailed fine-mapping of  
341 GWAS signals down to single variants, combined with emerging high-throughput  
342 genome-editing methodology, may be among the most effective ways to advance to a  
343 greater understanding of the biology of the non-coding genome.

344 **List of Figures**

345 **Figure 1. Procedures in the fine-mapping analysis. a,** Flowchart of fine-mapping steps.

346 Dashed line means the imputation has been performed only once after manual inspection  
347 (not iteratively). **b, An** example output from fine-mapping. This region has been mapped  
348 to two independent signals. For each signal, fine-mapping reports the phenotype it is  
349 associated with, the variants it is fine-mapped to and their posterior probabilities.

350 **Figure 2. Summary of fine-mapped associations. a,** sixty-eight loci hosting a single  
351 association and 26 loci hosting multiple independent associations. **b,** Number of variants  
352 in credible sets. 18 associations were fine-mapped to a single variant, and 116 to  $\leq 50$   
353 variants. Only credible sets having  $\leq 50$  variants were advanced for set-enrichment  
354 analyses (epigenetics and eQTL). **c,** distribution of the posterior probability in credible  
355 sets having  $\leq 50$  variants. 45 variants have posterior probability  $> 50\%$  and were  
356 advanced for variant-based enrichment analyses (coding, TFBS disruption and  
357 epigenetics).

358 **Figure 3. Functional annotation of causal variants. a,** Proportion of variants that are  
359 protein coding, disrupting/creating transcription factor binding motifs or synonymous. **b,**  
360 Epigenetic peaks overlapping credible variants in various cell lines. Sample categories  
361 were taken from the Roadmap Epigenomics Consortium<sup>36</sup>. Significant cell line-peak  
362 pairs have been marked with asterisks. **c,** Proportion of credible variants that overlap  
363 H4K4Me1 peaks. **d,** Proportion of credible variants that overlap H3K27ac peaks. In  
364 panels **a, c** and **d**, the vertical dotted lines mark the 50% probability and the horizontal  
365 dashed lines show the background proportions of each functional category.

366 **Figure 4. Number of credible sets that colocalize eQTLs.** The violin plot shows the  
367 distribution of the number of colocalizations by chance (background) and the solid points  
368 shows the observed number of colocalizations. P-values of the enrichment were shown  
369 next to the solid points. Both the background and the observed numbers were calculated  
370 using the permutation based approach (Methods).

371 **Figure 5. Fine-mapping improved the resolution of genetic associations.** We  
372 compare the numbers of variants that are mapped in each independent signal using the  
373 fine-mapping approach (y axis) and the  $R^2 > 0.6$  cut-off (x axis). Fine-mapping maps  
374 most signals to smaller numbers of variants.

375



376 **List of Tables**

377 Table 1: Summary of variants having posterior probability >50%. Variants were sorted  
 378 by their posterior probabilities. AF: allele frequency. PROB: posterior probability for  
 379 being a causal variant. FUNC: functional annotations including coding (C), Epigenetic  
 380 peaks (E), disrupting transcription factor binding sites (T) and colocalization with eQTL  
 381 (Q).

| VARIANT                                                                                        | CHR | POSITION  | TRAIT | AF    | PROB  | FUNC | ANNOTATION                                         |
|------------------------------------------------------------------------------------------------|-----|-----------|-------|-------|-------|------|----------------------------------------------------|
| <b>Signals mapped to a single variant</b>                                                      |     |           |       |       |       |      |                                                    |
| rs7307562                                                                                      | 12  | 40724960  | CD    | 0.398 | 0.999 |      | LRRK2 (intronic)                                   |
| rs2066844                                                                                      | 16  | 50745926  | CD    | 0.063 | 0.999 | C    | NOD2(R702W)                                        |
| rs2066845                                                                                      | 16  | 50756540  | CD    | 0.022 | 0.999 | C    | NOD2(G908R)                                        |
| rs6017342                                                                                      | 20  | 43065028  | UC    | 0.544 | 0.999 | E    | HNF4A (downstream),<br>Gut_H3K27ac                 |
| rs61839660                                                                                     | 10  | 6094697   | CD    | 0.094 | 0.999 | E    | IL2RA (intronic),<br>Immune_H3K4me1                |
| rs5743293                                                                                      | 16  | 50763781  | CD    | 0.964 | 0.999 | C    | fs1007insC                                         |
| rs6062496                                                                                      | 20  | 62329099  | IBD   | 0.587 | 0.996 | T    | RTEL1-<br>TNFRSF6B (ncRNA_intronic),<br>EBF1 TFBS  |
| rs141992399                                                                                    | 9   | 139259592 | IBD   | 0.005 | 0.995 | C    | CARD9(1434+1G>C)                                   |
| rs35667974                                                                                     | 2   | 163124637 | UC    | 0.021 | 0.994 | C    | IFIH1(I923V)                                       |
| rs74465132                                                                                     | 7   | 50304782  | IBD   | 0.034 | 0.994 | T,E  | IKZF1 (upstream),<br>EP300 TFBS,<br>Immune_H3K4me1 |
| rs4676408                                                                                      | 2   | 241574401 | UC    | 0.508 | 0.994 |      | GPR35 (downstream)                                 |
| rs5743271                                                                                      | 16  | 50744688  | CD    | 0.007 | 0.993 | C    | NOD2(N289S)                                        |
| rs10748781                                                                                     | 10  | 101283330 | IBD   | 0.55  | 0.990 | E    | NKX2-3 (upstream),<br>Gut_H3K27ac                  |
| rs35874463                                                                                     | 15  | 67457698  | IBD   | 0.054 | 0.989 | C,E  | SMAD3(I170V),<br>Gut_H3K27ac                       |
| rs72796367                                                                                     | 16  | 50762771  | CD    | 0.023 | 0.983 |      | NOD2 (intronic)                                    |
| rs1887428                                                                                      | 9   | 4984530   | IBD   | 0.603 | 0.974 |      | JAK2 (upstream)                                    |
| rs41313262                                                                                     | 1   | 67705900  | CD    | 0.014 | 0.973 | C    | IL23R(V362I)                                       |
| rs28701841                                                                                     | 6   | 106530330 | CD    | 0.116 | 0.971 |      | PRDM1 (upstream)                                   |
| <b>Signals mapped to ≥ 2 variants but the lead variant have posterior probability &gt; 50%</b> |     |           |       |       |       |      |                                                    |
| rs76418789                                                                                     | 1   | 67648596  | CD    | 0.006 | 0.937 | C    | IL23R(G149R)                                       |
| rs7711427                                                                                      | 5   | 40414886  | CD    | 0.633 | 0.919 |      |                                                    |
| rs1736137                                                                                      | 21  | 16806695  | CD    | 0.407 | 0.879 |      |                                                    |

|                |    |           |     |       |       |     |                                                                 |
|----------------|----|-----------|-----|-------|-------|-----|-----------------------------------------------------------------|
| rs104895444    | 16 | 50746199  | CD  | 0.003 | 0.865 | C   | NOD2(V793M)                                                     |
| rs56167332     | 5  | 158827769 | IBD | 0.353 | 0.845 |     | IL12B                                                           |
| rs104895467    | 16 | 50750810  | CD  | 0.002 | 0.833 | C   | NOD2(N852S)                                                     |
| rs630923       | 11 | 118754353 | CD  | 0.153 | 0.820 |     |                                                                 |
| rs3812565      | 9  | 139272502 | IBD | 0.402 | 0.815 | Q   | eQTL of INPP5E in CD4 and CD8;<br>CARD9 in CD14, SEC16A in CD15 |
| rs4655215      | 1  | 20137714  | UC  | 0.763 | 0.784 | E   | Gut_H3K27ac                                                     |
| rs145530718    | 19 | 10568883  | CD  | 0.023 | 0.762 |     |                                                                 |
| rs6426833      | 1  | 20171860  | UC  | 0.555 | 0.752 |     |                                                                 |
| chr20:43258079 | 20 | 43258079  | CD  | 0.041 | 0.736 |     |                                                                 |
| rs17229679     | 2  | 199560757 | UC  | 0.028 | 0.716 |     |                                                                 |
| rs4728142      | 7  | 128573967 | UC  | 0.448 | 0.664 | E   | Immune_H3K4me1                                                  |
| rs2143178      | 22 | 39660829  | IBD | 0.157 | 0.662 | T,E | NFKB TFBS, Gut_H3K27ac                                          |
| rs34536443     | 19 | 10463118  | CD  | 0.038 | 0.649 | C   | TYK2(P1104A)                                                    |
| rs138425259    | 16 | 50663477  | UC  | 0.009 | 0.648 |     |                                                                 |
| rs146029108    | 9  | 139329966 | CD  | 0.036 | 0.643 |     |                                                                 |
| rs12722504     | 10 | 6089777   | CD  | 0.26  | 0.615 |     |                                                                 |
| rs60542850     | 19 | 10488360  | IBD | 0.17  | 0.591 |     |                                                                 |
| rs2188962      | 5  | 131770805 | CD  | 0.44  | 0.590 | E,Q | Gut_H3K27ac,<br>eQTL of SLC22A5 in CD14, CD15<br>and IL         |
| rs2019262      | 1  | 67679990  | IBD | 0.4   | 0.586 |     |                                                                 |
| rs3024493      | 1  | 206943968 | IBD | 0.171 | 0.537 | E   | Immune_H3K4me1                                                  |
| rs7915475      | 10 | 64381668  | CD  | 0.304 | 0.528 |     |                                                                 |
| rs77981966     | 2  | 43777964  | CD  | 0.077 | 0.521 |     |                                                                 |
| rs9889296      | 17 | 32570547  | CD  | 0.264 | 0.512 |     |                                                                 |
| rs2476601      | 1  | 114377568 | CD  | 0.908 | 0.508 | C   | PTPN22(W620R)                                                   |

383 Supplemental Materials

384

385 **Extended Data Figure 1**, Power (y axis) to distinguish which variant in a correlated pair  
386 (strength of correlation shown by color) is causal increases with the significance of the  
387 association (x axis), and therefore with sample size and effect size. The vertical dashed  
388 line flags the genome-wide significance level. To estimate the relationship between the  
389 strength of association and our ability to fine-map it, we assumed that the association has  
390 only two possible causal variants, and we define the signal as successfully fine-mapped if  
391 the ratio of Bayes factors between the true causal variant and the non-causal variant is  
392 greater than 10 (a 91% posterior, assuming equal priors). Using equation (8) in  
393 Supplementary Methods, we have

$$\log\text{BF} = \log \frac{\Pr(\mathbf{Y} | \text{SNP1})}{\Pr(\mathbf{Y} | \text{SNP2})} \approx \log \frac{\Pr(\mathbf{Y} | \text{SNP1}, \theta_1^*)}{\Pr(\mathbf{Y} | \text{SNP2}, \theta_2^*)}$$

394 in which  $\theta^*$  is maximum likelihood estimate of the parameter values. The log-likelihood  
395 ratio follows a chi-square distribution:

$$\log\text{BF} \sim -\frac{1}{2}(\chi_{\text{SNP1}}^2 - \chi_{\text{SNP2}}^2) = -\frac{1}{2}\lambda(1 - r^2)$$

396 in which  $\lambda$  is the chi-square statistic of the lead variant and  $r$  is the correlation coefficient  
397 between the two variants. Because of the additive property of the chi-square distribution,  
398 logBF follows a non-central chi-square distribution with 1 degree of freedom and non-  
399 centrality parameter  $\lambda(1 - r^2)/2$ . Therefore, the power can be calculated as the probability  
400 that  $\log\text{BF} > \log(10)$ , given by the CDF of the non-central chi-squared distribution.

401

402 **Extended Data Figure 2, a**, Genomic distance that variants in 95% credible set span. **b**,  
403 Variance explained normalized to the primary association in each locus.

404

405 **Extended Data Figure 3. a**, Functional annotation for 45 variants having posterior  
406 probability > 50%. **b**, Functional annotation for 116 associations that are fine-mapped to  
407  $\leq 50$  variants.

408

409 **Extended Data Figure 4, a**, Number of variants in credible set decreases with the  
410 significance of the signal. **b**, Number of variants in credible set increases with the minor  
411 allele frequency of the signal. The solid line shows the fitted trend in both panels, and  
412 the shaded region shows the variance of the trend.

413

414 **Extended Data Figure 5**, SMAD3 (**a**) and TYK2 (**b**) regions after fine-mapping. The  
415 implicated region has been reduced to a smaller number of genes (shown in black). Color  
416 ticks are variants mapped to their functions and black ticks are variants not mapped to a  
417 function. The width of the tick scales with the posterior probability.

418

419 **Extended Data Figure 6**, Tissue and cell line specific expression for genes *SBNO2*,  
420 *IL10*, *IL19*, *LRRK2*, *KSR1*, *PRDM1*, *SMAD3*, *SMAD7*, *IFIH1*, *IL2RA*, *RETL1* and  
421 *TNFRSF6B*. **Left panels**. Expression levels of selected genes were determined in a panel  
422 of human tissues (bone marrow, heart, skeletal muscle (Sk. Muscle), uterus, liver, fetal  
423 liver (F. Liver), spleen, thymus, thyroid, prostate, brain, lung, small intestine (Sm.  
424 Intestine) and colon) and human cell lines using a custom made Agilent expression array.

425 The cell lines represent models of human T lymphocytes (Jurkat), monocytes (THP-1),  
426 erythroleukemia cells (K562), promyelocytic cells (HL-60), colonic epithelial cells  
427 (HCT-15, HT-29, Caco-2), and cells from embryonic kidney (HEK-293). In addition,  
428 models of differentiated colonic epithelium (Caco-2 differentiated for 21 days in culture  
429 (Caco-2 diff.)), activated T lymphocytes (Jurkat cells stimulated with PMA (40ng/ml)  
430 and ionomycin (1ug/ml) for 6 hrs (Jurkat stim.)), and macrophages (derived from THP-1  
431 differentiated for 24 hrs (THP-1 diff.) with IFN- $\gamma$  (400U/ml) and TNF- $\alpha$  (10ng/ml)) were  
432 examined. Intensity values for each tissue/cell line represent the geometric mean with  
433 geometric standard deviation of 3 independent measurements; each measurement  
434 represents the geometric mean of all probes (one per exon) for each gene followed by a  
435 median normalization across all genes on the array. The dotted line indicates the  
436 threshold level for detection of basal expression. The reference sample (Ref.) is  
437 composed of a mixture RNAs derived from 10 different human tissues. **Right panels.**  
438 Expression levels of selected genes were determined in a panel of primary immune cells  
439 (neutrophils, monocytes,  $\gamma\delta$  T cells, B cells, NK cells, CD4<sup>+</sup> T cells, CD8<sup>+</sup> T cells)  
440 isolated from healthy donors, as well as monocyte *in vitro* derived macrophages without  
441 and with 24 hours of stimulation using 1 ug/ml of lipopolysaccharide  
442 (macrophages+LPS). The results presented in the **left and right panels** were generated  
443 and analyzed separately and therefore the expression values are not directly comparable.  
444  
445 **Extended Data Table 1**, The number IBD credible sets that colocalize with expression  
446 QTLs using the naïve, permutation-based and Bayesian-based approaches.  
447

448 **Acknowledgements** M.J.D. and R.J.X. acknowledge grant supports from P30DK43351,  
449 U01DK062432, R01DK64869, Helmsley grant 2015PG-IBD001 and CCFA. C.A.A. and  
450 J.C.B are supported by Wellcome Trust grant 098051. M.G. acknowledges grant support  
451 from WELBIO (CAUSIBD), BELSPO (BeMGI), Fédération Wallonie-Bruxelles (ARC  
452 IBD@Ulg), and Région Wallonne (CIBLES, FEDER). H.H. acknowledges the  
453 ASHG/Charles J. Epstein Trainee Award. J.L. acknowledges Wellcome Trust grant  
454 098759/Z/12/Z. D.M. is supported by the Olle Engkvist Foundation and Swedish  
455 Research Council (grants 2010-2976 and 2013-3862). R.K.W. is supported by a VIDI  
456 grant (016.136.308) from the Netherlands Organization for Scientific Research (NWO).  
457 J.D.R. holds a Canada Research Chair and this work was supported by grants from the  
458 U.S. National Institute of Diabetes and Digestive and Kidney Diseases (DK064869;  
459 DK062432), a grant (CIHR #GPG-102170) from the Canadian Institutes of Health  
460 Research to the "CIHR Emerging Team in Integrative Biology of Inflammatory  
461 Diseases", and a *Large-Scale Applied Research Project in Genomics and Personalized  
462 Health* grant (GPH-129341) co-funded by the Government of Canada through Genome  
463 Canada and the Ministère de l'économie, de l'innovation et de l'exportation du Québec  
464 through Génome Québec as well as the Canadian Institutes of Health Research and  
465 Crohn's Colitis Canada. J.H.C. is funded by U01 DK62429, U01 DK062422, and the  
466 Sanford J. Grossman Charitable Trust. R.H.D. holds the Inflammatory Bowel Disease  
467 Genetic Research Chair at the University of Pittsburgh and acknowledges grant support  
468 from U01DK062420 and R01CA141743. E.D. benefitted from a Marie-Curie Fellowship  
469 and A-S.G. a from fellowships from the FNRS and Fonds Léon Fredericq. J.H. is  
470 supported by the Örebro University Hospital Research Foundation and the Swedish  
471 Research Council (grant no. 521 2011 2764). M.P. acknowledges the NIHR Biomedical  
472 Research Centre awards to Guy's & St Thomas' NHS Trust / King's College London and  
473 to Addenbrooke's Hospital / University of Cambridge School of Clinical Medicine.  
474 D.E.: this work was supported by the German Federal Ministry of Education and  
475 Research (BMBF) within the framework of the e:Med research and funding concept  
476 (SysInflame grant 01ZX1306A). This project received infrastructure support from the  
477 DFG Excellence Cluster No. 306 "Inflammation at Interfaces". A.F. receives an  
478 endowment professorship by the Foundation for Experimental Medicine (Zuerich,  
479 Switzerland).

480  
481 **Author Contributions** Overall project supervision and management: M.J.D. J.C.B, M.G.  
482 Fine-mapping algorithms: H.H., M.F., L.J. TFBS analyses: H.H., K.F. Epigenetic  
483 analyses: M.U.M., G.T. eQTL dataset generation: E.L., E.T., J.D., E.D., M.E., R.M.,  
484 M.M., Y.M., V.D., A.G. eQTL analyses: M.F., J.D., L.J., A.C. Variance component  
485 analysis: T.M., M.F. Contribution to overall statistical analyses: G.B. Primary drafting of  
486 the manuscript: M.J.D., J.C.B, M.G., H.H., L.J. Major contribution to drafting of the  
487 manuscript: M.F., M.U.M., J.H.C., D.P.M., J.D.R., C.G.M., R.H.D., R.K.W. The  
488 remaining authors contributed to the study conception, design, genotyping QC and/or  
489 writing of the manuscript. All authors saw, had the opportunity to comment on, and  
490 approved the final draft.

491  
492 **Competing Financial Interests** The authors declare no competing financial interests.  
493

## 494 **Methods**

### 495 **Genotyping and QC**

496 We genotyped 35,197 unaffected and 35,346 affected individuals (20,155 Crohn's  
497 disease and 15,191 ulcerative colitis) using the ImmunoChip array. Genotypes were  
498 called using optiCall<sup>37</sup> for 192,402 autosomal variants before QC. We removed variants  
499 with missing data rate >2% across the whole dataset, or >10% in any one batch, and  
500 variants that failed (FDR < 10<sup>-5</sup> in either the whole dataset or at least two batches) tests  
501 for: a) Hardy-Weinberg equilibrium; b) differential missingness between cases and  
502 controls; c) significant heterogeneity in allele frequency across controls from different  
503 batches. We also removed noncoding variants that were not in the 1000 Genomes Phase I  
504 integrated variant set (March 2012 release), or the HapMap phase 2 or 3 releases, as these  
505 mostly represent false positives included on ImmunoChip from the 1000 Genomes pilot,  
506 which often genotype poorly. Where a variant failed in exactly one batch we set all  
507 genotypes to missing for that batch (to be reimputed later) and included the site if it  
508 passed in the remainder of the batches. We removed individuals that had >2% missing  
509 data, had significantly higher or lower (defined as FDR<0.01) inbreeding coefficient (*F*),  
510 or were duplicated or related (PI\_HAT ≥ 0.4, calculated from the LD pruned dataset  
511 described below), by sequentially removing the individual with the largest number of  
512 related samples until no related samples remain. After QC, there were 67,852 European-  
513 derived samples with valid diagnosis (healthy control, Crohn's disease or ulcerative  
514 colitis), and 161,681 genotyped variants available for downstream analyses.

### 515 **Linkage-disequilibrium pruning and principal components analysis**

516 From the clean dataset we removed variants in long range LD<sup>38</sup> or with MAF < 0.05, and  
517 then pruned 3 times using the '--indep' option in PLINK (with window size of 50, step

518 size of 5 and VIF threshold of 1.25). This pruned dataset (18,123 variants) was used to  
519 calculate the relatedness of the individuals and the principal components. Principal  
520 component axes were generated within controls using this LD pruned dataset. The axes  
521 were then projected to cases to generate the principal components for all samples. The  
522 analysis was performed using our in-house C code  
523 (<https://github.com/hailianghuang/efficientPCA>) and LAPACK package<sup>39</sup> for efficiency.

#### 524 **Imputation**

525 Imputation was performed separately in each ImmunoChip high-density region (184 total)  
526 from the 1000 Genomes Phase I integrated haplotype reference panel, downloaded from  
527 the IMPUTE2 website (Dec 2013 release). We used SHAPEIT (v2.r769)<sup>40,41</sup> to pre-phase  
528 the genotypes, followed by IMPUTE2 (2.3.0)<sup>14,15</sup> to perform the imputation. There were  
529 388,432 variants having good imputation quality (INFO > 0.4) and were used in the fine-  
530 mapping analysis.

#### 531 **Manual cluster plot inspection**

532 Variants that had posterior probability greater than 50% or in credible sets mapped to  $\leq$   
533 10 variants were manually inspected using Evoker v2.2<sup>42</sup>. Each variant was inspected by  
534 3 independent reviewers (10 reviewers participated) and scored as pass, fail or maybe.  
535 We remove variants that received one or more fails, or received less than 2 passes. 650  
536 out of 905 inspected variants passed this inspection. A further cluster plot inspection  
537 flagged two additional failed variants after removing the failed variants from the first  
538 inspection and redoing the imputation and analysis.

#### 539 **Establishing a p-value threshold**

540 We used a multiple testing corrected p-value threshold for associations of  $10^{-6}$ , which was  
541 established by permutation. We generated 200 permuted datasets by randomly shuffling  
542 phenotypes across samples and carried out association analyses for each permutation  
543 across all 161,681 variants in our high-density regions. We stored (i) the ensuing  
544 161,681 x 200 point-wise p-values ( $\alpha_S$ ), as well as (ii) the 200 “best” p-values ( $\alpha_B$ ) of  
545 each permuted datasets. We then computed the empirical, family-wise p-value  
546 ( $\alpha_M$ )(corrected for multiple testing) for each of the 161,681 x 200 tests as its rank/200  
547 with respect to the 200  $\alpha_B$ . We then estimated the number of independent tests  
548 performed in the studied regions,  $n$ , as the slope of the regression of  $\log(1-\alpha_M)$  on  $\log(1-$   
549  $\alpha_S)$ , knowing that  $\alpha_M = 1 - (1 - \alpha_S)^n$ .

#### 550 **Detecting and fine-mapping association signals**

551 We used three fine-mapping methods to detect independent signals and create credible  
552 sets across 103 high-density regions (Supplementary Methods). Signals identified by  
553 different methods were merged if their credible sets shared one or more variants. In order  
554 to adjudicate differences between methods, we first assigned each candidate signal to the  
555 combination of a lead variant and trait (CD, UC or IBD) that maximizes the marginal  
556 likelihood from equation (8) in Supplementary Methods. At loci with >1 signal, we fixed  
557 the signals reported by all three methods, and then tested all possible combinations of  
558 signals reported by one or two methods, selecting whichever combination has the highest  
559 joint marginal likelihood. We consider signals to be confidently fine-mapped, and take  
560 them forward for subsequent analysis, if they a) are in loci where the lead variant has  $p <$   
561  $10^{-6}$ , b) have a ratio of Bayes factors for the best model and the second best model greater  
562 than 10, c) are reported by more than one method and d) passed cluster plot inspection.



563 **Phenotype assignment of signals**

564 We assign each signal as CD-specific, UC-specific or shared, using the Bayesian  
565 multinomial model used for fine-mapping method 2 (the method best able to assess  
566 evidence of sharing in the presence of potentially correlated effect sizes). For the lead  
567 variant for each credible set, we calculate the marginal likelihoods as in equation 13 from  
568 Supplementary Methods, restricting either  $\beta_{UC} = 0$  (for the CD-only model) or  $\beta_{CD} =$   
569  $0$  (for the UC-only model), as well as using the unconstrained prior (for the associated to  
570 both model), and select the model with the highest marginal likelihood. We then calculate  
571 the log Bayes factor in favor of sharing, i.e. the log of ratio of marginal likelihoods  
572 between the associated-to-both model and the best of the single-phenotype associated  
573 models.

574 **Estimating the variance explained by the fine-mapping**

575 We used a mixed model framework to estimate the total risk variance attributable to the  
576 IBD risk loci, and to the signals identified in the fine-mapping. We the GCTA software  
577 package<sup>43</sup> to compute a gametic relationship matrix (G-matrix) using genotype dosage  
578 information for the genotyped variants in the high-density regions (which we will call  
579  $\mathbf{G}_{HD}$ ). We then fit a variety of variance component models by restricted maximum  
580 likelihood analysis using an underlying liability threshold model implemented with the  
581 DMU package<sup>44</sup>. The first model is a standard heritability mixed-model that includes  
582 fixed effects for five principal components (to correct for stratification) and a random  
583 effect summarizing the contribution of all variants in the fine-mapping regions, such that  
584 the liabilities across all individuals are distributed according to

$$L \sim N(\beta_1 PC_1 + \dots + \beta_5 PC_5, \lambda_1 \mathbf{G}_{HD} + (1 - \lambda_1)I),$$

585 where  $\lambda_1$  is thus the variance explained by all variants in fine-mapping regions, which  
586 we estimate. We then fitted a model that included an additional random effect for the  
587 contribution of the lead variants have been specifically identified (with G-matrix  
588  $\mathbf{G}_{Signals}$ ), such that liability is distributed

$$L \sim N(\beta_1 PC_1 + \dots + \beta_5 PC_5, \lambda'_1 \mathbf{G}_{HD} + \lambda_2 \mathbf{G}_{Signals} + (1 - \lambda'_1 - \lambda_2)I)$$

589 The variance explained by the signals under consideration is then given by the reduction  
590 in the variance explained by all variants in the fine-mapping regions between the two  
591 models ( $\lambda_1 - \lambda'_1$ ). We used this approach to estimated what fraction of this variance  
592 was accounted for by (i) the single strongest signals in each region (as would be typically  
593 done prior to fine-mapping), or (ii) the all signals identified in fine-mapping. We used  
594 Cox and Snell's method<sup>45</sup> to estimate the variance explained across independent signals  
595 (Extended Data Figure 2b) for computational efficiency.

#### 596 **Overlap between transcription factor binding motifs and causal variants**

597 For each motif in the ENCODE TF ChIP-seq data ([http://compbio.mit.edu/encode-](http://compbio.mit.edu/encode-motifs/)  
598 [motifs/](http://compbio.mit.edu/encode-motifs/), accessed Nov 2014)<sup>20</sup>, we calculated the overall information content (IC) as the  
599 sum of IC for each position<sup>46</sup>, and only considered motifs with overall  $IC \geq 14$  bits  
600 (equivalent to 7 perfectly conserved positions). For every variant in a high-density region  
601 we determined if it creates or disrupts a motif at a high-information site ( $IC \geq 1.8$ ). For  
602 each credible set that contains a motif-affecting variant, we calculated a p-value as  
603  $1 - (1 - f)^n$ , where  $n$  is the size of the credible set and  $f$  is the proportion of all variants  
604 in the high-density region that disrupt or a create a motif in that TF family.

#### 605 **Overlap between epigenetic signatures and causal variants**

606 For each combination of 120 tissues and three histone marks (H3K4me1, H3K4me3 and  
607 H3K27ac) from the Roadmap Epigenome Project we calculated an overlap score, equal  
608 to the sum of fine-mapping posterior probabilities for all variants in peaks of that histone  
609 mark in that tissue. We generated a null distribution of this score for each tissue/mark by  
610 shifting chromatin marks randomly over the high-density regions (shifting the peaks  
611 from their actual position by a random number of bases while keeping inter-peak spacing  
612 the same) and calculating the overlap score for each permutation. To summarize these  
613 correlated results across many cell and tissue types we defined a set of “core” H3K4me1  
614 immune and H3K27ac gut peaks as sets of overlapping peaks in cells that showed the  
615 strongest enrichment ( $p < 10^{-4}$ ). Intersects were made using bedtools v2.24.0 default  
616 settings<sup>47</sup>. We selected 6 immune cell types for H3K4me1 and 3 gut cell types for  
617 H3K27ac (Supplementary Table 2). We also chose controls (Supplementary Table 2)  
618 from non-immune and non-gut cell types with similar density of peaks in the fine-  
619 mapped regions as compared to immune/gut cell types to confirm the tissue-specificity of  
620 the overlap. We used the phenotype assignments (described above) in dissecting the  
621 enrichment for the CD and UC signals. Sixty-five CD and 21 UC signals were used in  
622 this analysis.

### 623 **Published eQTL summary statistics**

624 We used eQTL summary statistics from two published studies:

- 625 • Peripheral blood eQTLs from the GODOT study<sup>48</sup> of 2,752 twins, reporting loci with  
626 MAF > 0.5%.
- 627 • CD14+ monocyte eQTLs from Table S2 in Fairfax *et al.*<sup>31</sup>, comprised of 432  
628 European individuals, measured in a naïve state and after stimulation with interferon-

629  $\gamma$  (for 2 or 24 hours) or lipopolysaccharide. Reports loci with  $MAF > 4\%$  and  
630  $FDR < 0.05$ .

### 631 **Processing and quality control of new eQTL ULg dataset**

632 A detailed description of the ULg dataset is in preparation (Momozawa et al., in  
633 preparation). Briefly, we collected venous blood and intestinal biopsies at three locations  
634 (ileum, transverse colon and rectum) from 350 healthy individuals of European descent,  
635 average age 54 (range 17-87), 56% female. SNPs were genotyped on Illumina Human  
636 OmniExpress v1.0 arrays interrogating 730,525 variants, and SNPs and individuals were  
637 subject to standard QC procedures using call rate, Hardy-Weinberg equilibrium,  $MAF \geq$   
638 0.05, and consistency between declared and genotype-based sex as criteria. We further  
639 imputed genotypes at ~7 million variants on the entire cohort using the Impute2 software  
640 package<sup>14</sup> and the 1,000 Genomes Project as reference population (Phase 3 integrated  
641 variant set, released 12 Oct 2014)<sup>11,15</sup>. From the blood, we purified CD4+, CD8+,  
642 CD19+, CD14+ and CD15+ cells by positive selection, and platelets (CD45-negative) by  
643 negative selection. RNA from all leucocyte samples and intestinal biopsies was  
644 hybridized on Illumina Human HT-12 arrays v4. After standard QC, raw fluorescent  
645 intensities were variance stabilized<sup>49</sup> and quantile normalized<sup>50</sup> using the lumi R  
646 package<sup>51</sup>, and were corrected for sex, age, smoking status, number of probes with  
647 expression level significantly above background as fixed effects and array number  
648 (sentrix id) as random effect. For each probe with measureable expression (detection p-  
649 value  $< 0.05$  in  $> 25\%$  of samples) we tested for cis-eQTLs at all variants within a 500  
650 kilobase window. The nominal p-value of the best SNP within a cis-window was Sidak-  
651 corrected for the window-specific number of independent tests, and we estimated false

652 discovery rates (q-values) from the resulting p-values across all probes using the qvalue  
653 R package<sup>52</sup>. 480 cis-eQTL with  $FDR \leq 0.10$  with the lead SNPs within the 97 high-  
654 density regions (94 fine-mapped plus 3 unresolved) were retained for further analyses.

#### 655 **Naïve co-localization using lead SNPs**

656 We calculated the proportion of IBD credible sets that contain a lead eQTL variant in a  
657 particular tissue. This value is then compared to a background rate:

$$\frac{1}{|S|} \sum_{i \in S} (1 - (1 - N_i^{-1})^{C_i})$$

658 where  $N_i$  is the total number of variants in region  $i$  in 1000 Genomes with an allele  
659 frequency greater than a certain threshold (equal to the threshold used for the original  
660 eQTL study),  $C_i$  is the number of these variants that lie in IBD credible sets, and  $S$  is a set  
661 of regions that have at least one significant eQTL ( $|S|$  is the number of regions in this  
662 set). P-values can then be calculated assuming a binomial distribution with probability  
663 equal to the background rate and the number of trials equal to  $|S|$ .

#### 664 **Frequentist co-localization using conditional p-values**

665 We next used conditional association to test for evidence of co-localization, as described  
666 in Nica et al.<sup>25</sup>. This method compares the p-value of association for the lead SNP of an  
667 eQTL before and after conditioning on the SNP with the highest posterior in the credible  
668 set, and measures the drop in  $\log(1/p)$ . An empirical p-value for this drop is then  
669 calculated by comparing it to the drop for all variants (with  $MAF \geq 0.05$ ) in the high-  
670 density region. An empirical p-value  $\leq 0.05$  was considered as evidence that the  
671 corresponding credible set is co-localized with the corresponding cis-eQTL. To evaluate  
672 whether our 139 credible sets affected cis-eQTL more often than expected by chance we  
673 counted the number of credible sets affecting at least one cis-eQTL with p-value  $\leq 0.05$ ,

674 and compared how often this number was matched or exceeded by 1,000 sets of 139 lead  
675 variants that were randomly selected yet distributed amongst the 94 loci in accordance  
676 with the real credible sets.

### 677 **Bayesian co-localization using Bayes factors**

678 Finally, we used the Bayesian co-localization methodology described by Giambartolomei  
679 et al<sup>53</sup>, modified to use the credible sets and posteriors generated by our fine-mapping  
680 methods. The method takes as input a pair of IBD and eQTL signals, with corresponding  
681 credible sets  $S^{IBD}$  and  $S^{eQTL}$ , and posteriors for each variant  $p_i^{IBD}$  and  $p_i^{eQTL}$  (with  
682  $p_i^X = 0 \forall i \notin S^X$ ). Credible sets and posteriors were generated for eQTL signals using  
683 the Bayesian quantitative association mode in SNPTest (with default parameters), with  
684 credible sets in regions with multiple independent signals generated conditional on all  
685 other signals. Our method calculates a Bayes factor summarizing the evidence in favor of  
686 a colocalized model (i.e. a single underlying causal variant between the IBD and eQTL  
687 signals) compared to a non-colocalized model (where different causal variants are driving  
688 the two signals), given by the ratio of marginal likelihoods

$$689 \quad BF = \frac{L(\text{Colocalized})}{L(\text{Not colocalized})}.$$

690 The marginal likelihood for the colocalized model (i.e. hypothesis  $H_4$  in Giambartolomei  
691 et al) is given by

$$L(\text{Colocalized}) \propto \frac{1}{N} \sum_{i \in S^{IBD} \cup S^{eQTL}} p_i^{IBD} p_i^{eQTL}$$

692 and the likelihood for the model where the signals are not colocalized (i.e., hypothesis  
693  $H_3$ ) is given by:

$$L(\text{Not colocalized}) \propto \frac{1}{N^2 - N} \sum_{i,j \in S^{IBD} \cap S^{eQTL}, i \neq j} p_i^{IBD} p_j^{eQTL}$$

694 In both cases,  $N$  is the total number of variants in the region. We only count towards  $N$

695 variants that have  $r^2 > 0.2$  with either the lead eQTL variant or the lead IBD variant.

696 *Permutation analysis.* To measure enrichment in colocalization Bayes factors compared

697 to the null, we carried out a permutation analysis. In this analysis, we randomly

698 reassigned eQTL signals to new fine-mapping regions to generate a set of simulated null

699 datasets. This is carried out using the following scheme:

700 1. Estimate the standardized effect size  $\beta_g$  for each eQTL signal  $g$ , equal to standard

701 deviation increase in gene expression for each dose of the minor allele.

702 2. Randomly reassign each eQTL signal to a new fine-mapping region, and then select a

703 new causal variant with a minor allele frequency within 1 percentage point of the lead

704 variant from the real signal. If multiple such variants exist, select one at random. If no

705 such variants exist, pick the variant with the closest minor allele frequency.

706 3. Generate new simulated gene expression signals for each individual from

707  $\text{Normal}(\beta_g x_j, 1 - \beta_g^2)$  where  $x_j$  is the individual's minor allele dosage at the new

708 causal variant and  $f$  is the minor allele frequency.

709 4. Carry out fine-mapping and calculate colocalization Bayes factors for each pair of

710 (real) IBD signal and (simulated) eQTL signal.

711 5. Repeat stages 2-4 1000 times for each tissue type

712 We can use these permuted Bayes factors to calculate p-values for each IBD credible set,

713 given by the proportion of time the permuted BFs were as large or greater than the one

714 observed in the real dataset. To generate a high-quality set of colocalized eQTL and IBD

715 signals, we take all signals that have  $BF > 2$ ,  $p < 0.01$  and  $r^2$  between hits of  $>0.8$ .

716



## 717 References

- 718 1. Kappelman, M. D. *et al.* Direct health care costs of Crohn's disease and ulcerative  
719 colitis in US children and adults. *Gastroenterology* **135**, 1907–1913 (2008).
- 720 2. Molodecky, N. A. *et al.* Increasing incidence and prevalence of the inflammatory  
721 bowel diseases with time, based on systematic review. *Gastroenterology* **142**, 46–  
722 54.e42– quiz e30 (2012).
- 723 3. Jostins, L. *et al.* Host–microbe interactions have shaped the genetic architecture of  
724 inflammatory bowel disease. *Nature* **491**, 119–124 (2012).
- 725 4. Liu, J. Z. *et al.* Association analyses identify 38 susceptibility loci for  
726 inflammatory bowel disease and highlight shared genetic risk across populations.  
727 *Nat Genet* (2015). doi:10.1038/ng.3359
- 728 5. van de Bunt, M. *et al.* Evaluating the Performance of Fine-Mapping Strategies at  
729 Common Variant GWAS Loci. *PLoS Genet* **11**, e1005535 (2015).
- 730 6. Maller, J. B. *et al.* Bayesian refinement of association signals for 14 loci in 3  
731 common diseases. *Nat Genet* **44**, 1294–1301 (2012).
- 732 7. Yang, J. *et al.* FTO genotype is associated with phenotypic variability of body  
733 mass index. *Nature* **490**, 267–272 (2012).
- 734 8. International Multiple Sclerosis Genetics Consortium (IMSGC) *et al.* Analysis of  
735 immune-related loci identifies 48 new susceptibility variants for multiple sclerosis.  
736 *Nat Genet* **45**, 1353–1360 (2013).
- 737 9. Onengut-Gumuscu, S. *et al.* Fine mapping of type 1 diabetes susceptibility loci and  
738 evidence for colocalization of causal variants with lymphoid gene enhancers. *Nat*  
739 *Genet* **47**, 381–386 (2015).
- 740 10. 1000 Genomes Project Consortium *et al.* An integrated map of genetic variation  
741 from 1,092 human genomes. *Nature* **491**, 56–65 (2012).
- 742 11. 1000 Genomes Project Consortium. A map of human genome variation from  
743 population-scale sequencing. *Nature* **467**, 1061–1073 (2010).
- 744 12. Jostins, L. Using Next-Generation Genomic Datasets In Disease Association. (The  
745 University of Cambridge, 2012).
- 746 13. Goyette, P. *et al.* High-density mapping of the MHC identifies a shared role for  
747 HLA-DRB1\*01:03 in inflammatory bowel diseases and heterozygous advantage in  
748 ulcerative colitis. *Nat Genet* (2015). doi:10.1038/ng.3176
- 749 14. Howie, B. N., Donnelly, P. & Marchini, J. A flexible and accurate genotype  
750 imputation method for the next generation of genome-wide association studies.  
751 *PLoS Genet* **5**, e1000529 (2009).
- 752 15. Howie, B., Marchini, J. & Stephens, M. Genotype imputation with thousands of  
753 genomes. *G3 (Bethesda)* **1**, 457–470 (2011).
- 754 16. Rivas, M. A. *et al.* Deep resequencing of GWAS loci identifies independent rare  
755 variants associated with inflammatory bowel disease. *Nat Genet* **43**, 1066–1073  
756 (2011).
- 757 17. Yang, J. *et al.* Genome partitioning of genetic variation for complex traits using  
758 common SNPs. *Nat Genet* **43**, 519–525 (2011).
- 759 18. Huang, H., Chanda, P., Alonso, A., Bader, J. S. & Arking, D. E. Gene-based tests  
760 of association. *PLoS Genet* **7**, e1002177 (2011).
- 761 19. Momozawa, Y. *et al.* Resequencing of positional candidates identifies low

- 762 frequency IL23R coding variants protecting against inflammatory bowel disease.  
763 *Nat Genet* **43**, 43–47 (2011).
- 764 20. Kheradpour, P. & Kellis, M. Systematic discovery and characterization of  
765 regulatory motifs in ENCODE TF binding experiments. *Nucleic Acids Res* **42**,  
766 2976–2987 (2014).
- 767 21. Nechanitzky, R. *et al.* Transcription factor EBF1 is essential for the maintenance  
768 of B cell identity and prevention of alternative fates in committed cells. *Nat.*  
769 *Immunol.* **14**, 867–875 (2013).
- 770 22. Trynka, G. *et al.* Chromatin marks identify critical cell types for fine mapping  
771 complex trait variants. *Nat Genet* **45**, 124–130 (2013).
- 772 23. Farh, K. K.-H. *et al.* Genetic and epigenetic fine mapping of causal autoimmune  
773 disease variants. *Nature* **518**, 337–343 (2015).
- 774 24. Bernstein, B. E. *et al.* The NIH Roadmap Epigenomics Mapping Consortium. *Nat*  
775 *Biotechnol* **28**, 1045–1048 (2010).
- 776 25. Nica, A. C. *et al.* Candidate causal regulatory effects by integration of expression  
777 QTLs with complex trait genetic associations. *PLoS Genet* **6**, e1000895 (2010).
- 778 26. Lappalainen, T. *et al.* Transcriptome and genome sequencing uncovers functional  
779 variation in humans. *Nature* **501**, 506–511 (2013).
- 780 27. Wallace, C. *et al.* Statistical colocalization of monocyte gene expression and  
781 genetic risk variants for type 1 diabetes. *Human Molecular Genetics* **21**, 2815–  
782 2824 (2012).
- 783 28. Trynka, G. *et al.* Dense genotyping identifies and localizes multiple common and  
784 rare variant association signals in celiac disease. *Nat Genet* **43**, 1193–1201 (2011).
- 785 29. Grundberg, E. *et al.* Mapping cis- and trans-regulatory effects across multiple  
786 tissues in twins. *Nat Genet* **44**, 1084–1089 (2012).
- 787 30. Westra, H.-J. *et al.* Systematic identification of trans eQTLs as putative drivers of  
788 known disease associations. *Nat Genet* **45**, 1238–1243 (2013).
- 789 31. Fairfax, B. P. *et al.* Innate immune activity conditions the effect of regulatory  
790 variants upon monocyte gene expression. *Science (New York, NY)* **343**, 1246949–+  
791 (2014).
- 792 32. Schizophrenia Working Group of the Psychiatric Genomics Consortium.  
793 Biological insights from 108 schizophrenia-associated genetic loci. *Nature* **511**,  
794 421–427 (2014).
- 795 33. Franke, A. *et al.* Genome-wide meta-analysis increases to 71 the number of  
796 confirmed Crohn's disease susceptibility loci. *Nat Genet* **42**, 1118–1125 (2010).
- 797 34. Nejentsev, S., Walker, N., Riches, D., Egholm, M. & Todd, J. A. Rare variants of  
798 IFIH1, a gene implicated in antiviral responses, protect against type 1 diabetes.  
799 *Science (New York, NY)* **324**, 387–389 (2009).
- 800 35. Huang, J., Ellinghaus, D., Franke, A., Howie, B. & Li, Y. 1000 Genomes-based  
801 imputation identifies novel and refined associations for the Wellcome Trust Case  
802 Control Consortium phase 1 Data. *Eur. J. Hum. Genet.* **20**, 801–805 (2012).
- 803 36. Consortium, R. E. *et al.* Integrative analysis of 111 reference human epigenomes.  
804 *Nature* **518**, 317–330 (2015).
- 805 37. Shah, T. S. *et al.* optiCall: a robust genotype-calling algorithm for rare, low-  
806 frequency and common variants. *Bioinformatics* **28**, 1598–1603 (2012).
- 807 38. Price, A. L. *et al.* Long-Range LD Can Confound Genome Scans in Admixed

- 808 Populations. *Am J Hum Genet* **83**, 132–135 (2008).
- 809 39. Anderson, E. *et al.* *LAPACK Users' Guide*. (Society for Industrial and Applied  
810 Mathematics, 1999).
- 811 40. Delaneau, O., Marchini, J. & Zagury, J.-F. A linear complexity phasing method for  
812 thousands of genomes. *Nature Methods* **9**, 179–181 (2011).
- 813 41. Delaneau, O., Zagury, J.-F. & Marchini, J. Improved whole-chromosome phasing  
814 for disease and population genetic studies. *Nature Methods* **10**, 5–6 (2012).
- 815 42. Morris, J. A., Randall, J. C., Maller, J. B. & Barrett, J. C. Evoker: a visualization  
816 tool for genotype intensity data. *Bioinformatics* **26**, 1786–1787 (2010).
- 817 43. Yang, J., Lee, S. H., Goddard, M. E. & Visscher, P. M. GCTA: A Tool for  
818 Genome-wide Complex Trait Analysis. *The American Journal of Human Genetics*  
819 **88**, 76–82 (2011).
- 820 44. Madsen, P., Su, G., Labouriau, R. & Christensen, F. DMU—a package for analyzing  
821 multivariate mixed models. *Proceedings of the Ninth World Congress on Genetics*  
822 *Applied to Livestock Production* (2010).
- 823 45. Cox, D. R. & Snell, E. J. *Analysis of Binary Data, Second Edition*. (CRC Press,  
824 1989).
- 825 46. D'haeseleer, P. What are DNA sequence motifs? *Nat Biotechnol* **24**, 423–425  
826 (2006).
- 827 47. Quinlan, A. R. & Hall, I. M. BEDTools: a flexible suite of utilities for comparing  
828 genomic features. *Bioinformatics* **26**, 841–842 (2010).
- 829 48. Wright, F. A. *et al.* Heritability and genomics of gene expression in peripheral  
830 blood. *Nat Genet* **46**, 430–437 (2014).
- 831 49. Lin, S. M., Du, P., Huber, W. & Kibbe, W. A. Model-based variance-stabilizing  
832 transformation for Illumina microarray data. *Nucleic Acids Res* **36**, e11–e11  
833 (2008).
- 834 50. Bolstad, B. M., Irizarry, R. A., Astrand, M. & Speed, T. P. A comparison of  
835 normalization methods for high density oligonucleotide array data based on  
836 variance and bias. *Bioinformatics* **19**, 185–193 (2003).
- 837 51. Du, P., Kibbe, W. A. & Lin, S. M. lumi: a pipeline for processing Illumina  
838 microarray. *Bioinformatics* **24**, 1547–1548 (2008).
- 839 52. Dabney, A., Storey, J. D. & Warnes, G. Q-value estimation for false discovery rate  
840 control. *R package version 1*, (2006).
- 841 53. Giambartolomei, C. *et al.* Bayesian test for colocalisation between pairs of genetic  
842 association studies using summary statistics. *PLoS Genet* **10**, e1004383 (2014).
- 843
- 844

845 **Acknowledgements (original data):** We thank all the subjects who contributed samples  
846 and the physicians and nursing staff who helped with recruitment globally. UK case  
847 collections were supported by the National Association for Colitis and Crohn's disease;  
848 Wellcome Trust grant 098051 (L.J., C.A.A., J.C.B.); Medical Research Council UK; the  
849 Catherine McEwan Foundation; an NHS Research Scotland career fellowship (R.K.R.);  
850 Peninsula College of Medicine and Dentistry, Exeter; the National Institute for Health  
851 Research, through the Comprehensive Local Research Network, and through  
852 Biomedical Research Centre awards to Guy's & Saint Thomas' National Health Service  
853 Trust, King's College London, Addenbrooke's Hospital, University of Cambridge School  
854 of Clinical Medicine and to the University of Manchester and Central Manchester  
855 Foundation Trust. The British 1958 Birth Cohort DNA collection was funded by Medical  
856 Research Council grant G0000934 and Wellcome Trust grant 068545/Z/02, and the  
857 UK National Blood Service controls by the Wellcome Trust. The Wellcome Trust  
858 Case Control Consortium projects were supported by Wellcome Trust grants  
859 083948/Z/07/ Z, 085475/B/08/Z and 085475/Z/08/Z. North American collections and  
860 data processing were supported by funds to the National Institute of Diabetes, Digestive  
861 and Kidney diseases (NIDDK) IBD Genetics Consortium, which is funded by the  
862 following grants: DK062431 (S.R.B.), DK062422 (J.H.C.), DK062420 (R.H.D.),  
863 DK062432 (J.D.R.), DK062423 (M.S.S.), DK062413 (D.P.M.), DK076984 (M.J.D.),  
864 DK084554 (M.J.D. and D.P.M.) and DK062429 (J.H.C.). The funding source which  
865 enabled our recruitment of New Zealand subjects for the IIBDGC was the New Zealand  
866 Ministry of Business, Innovation and Employment.

867  
868 **Members of the International Inflammatory Bowel Disease Genetics Consortium:**  
869 Clara Abraham<sup>35</sup>, Jean-Paul Achkar<sup>36,37</sup>, Tariq Ahmad<sup>38</sup>, Leila Amininejad<sup>39,40</sup>, Ashwin  
870 N Ananthakrishnan<sup>29,41</sup>, Vibeke Andersen<sup>9,10,42</sup>, Carl A Anderson<sup>7</sup>, Jane M Andrews<sup>43</sup>,  
871 Vito Annese<sup>44,45</sup>, Guy Aumais<sup>33,46</sup>, Leonard Baidoo<sup>30</sup>, Robert N Baldassano<sup>47</sup>, Peter A  
872 Bampton<sup>48</sup>, Murray Barclay<sup>49</sup>, Jeffrey C Barrett<sup>7</sup>, Theodore M Bayless<sup>50</sup>, Johannes  
873 Bethge<sup>51</sup>, Alain Bitton<sup>52</sup>, Gabrielle Boucher<sup>8</sup>, Stephan Brand<sup>53</sup>, Berenice Brandt<sup>51</sup>, Steven  
874 R Brant<sup>50</sup>, Carsten Büning<sup>54</sup>, Angela Chew<sup>20,55</sup>, Judy H Cho<sup>34</sup>, Isabelle Cleynen<sup>11</sup>, Ariella  
875 Cohain<sup>56</sup>, Anthony Croft<sup>57</sup>, Mark J Daly<sup>1,2</sup>, Mauro D'Amato<sup>12,13</sup>, Silvio Danese<sup>58</sup>, Dirk De  
876 Jong<sup>59</sup>, Martine De Vos<sup>60</sup>, Goda Denapiene<sup>61</sup>, Lee A Denson<sup>62</sup>, Kathy L Devaney<sup>29</sup>,  
877 Olivier Dewit<sup>63</sup>, Renata D'Inca<sup>64</sup>, Marla Dubinsky<sup>65</sup>, Richard H Duerr<sup>30,31</sup>, Cathryn  
878 Edwards<sup>66</sup>, David Ellinghaus<sup>15</sup>, Jonah Essers<sup>67,68</sup>, Lynnette R Ferguson<sup>69</sup>, Eleonora A  
879 Festen<sup>27</sup>, Philip Fleshner<sup>17</sup>, Tim Florin<sup>70</sup>, Denis Franchimont<sup>39,40</sup>, Andre Franke<sup>15</sup>, Karin  
880 Fransen<sup>71</sup>, Richard Geary<sup>49,72</sup>, Michel Georges<sup>3,4</sup>, Christian Gieger<sup>73</sup>, Jürgen Glas<sup>53,74</sup>,  
881 Philippe Goyette<sup>8</sup>, Todd Green<sup>2,67</sup>, Anne M Griffiths<sup>75</sup>, Stephen L Guthery<sup>76</sup>, Hakon  
882 Hakonarson<sup>47</sup>, Jonas Halfvarson<sup>16</sup>, Katherine Hanigan<sup>57</sup>, Talin Haritunians<sup>17</sup>, Ailsa  
883 Hart<sup>77</sup>, Chris Hawkey<sup>78</sup>, Nicholas K Hayward<sup>79</sup>, Matija Hedl<sup>35</sup>, Paul Henderson<sup>80,81</sup>, Xinli  
884 Hu<sup>82</sup>, Hailiang Huang<sup>1,2</sup>, Jean-Pierre Hugot<sup>83</sup>, Ken Y Hui<sup>34</sup>, Marcin Imielinski<sup>47</sup>, Andrew  
885 Ippoliti<sup>17</sup>, Laimas Jonaitis<sup>84</sup>, Luke Jostins<sup>5,6</sup>, Tom H Karlsen<sup>85,86,87</sup>, Nicholas A  
886 Kennedy<sup>21</sup>, Mohammed Azam Khan<sup>88,89</sup>, Gediminas Kiudelis<sup>84</sup>, Krupa Krishnaprasad<sup>90</sup>,  
887 Subra Kugathasan<sup>91</sup>, Limas Kupcinkas<sup>92</sup>, Anna Latiano<sup>44</sup>, Debby Laukens<sup>60</sup>, Ian C  
888 Lawrance<sup>19,20</sup>, James C Lee<sup>24</sup>, Charlie W Lees<sup>21</sup>, Marcis Leja<sup>93</sup>, Johan Van Limbergen<sup>75</sup>,  
889 Paolo Lionetti<sup>94</sup>, Jimmy Z Liu<sup>7</sup>, Edouard Louis<sup>22</sup>, Gillian Mahy<sup>95</sup>, John Mansfield<sup>96</sup>,  
890 Dunecan Massey<sup>24</sup>, Christopher G Mathew<sup>25,32</sup>, Dermot PB McGovern<sup>17</sup>, Raquel

891 Milgrom<sup>97</sup>, Mitja Mitrovic<sup>71,98</sup>, Grant W Montgomery<sup>79</sup>, Craig Mowat<sup>99</sup>, William  
892 Newman<sup>88,89</sup>, Aylwin Ng<sup>29,100</sup>, Siew C Ng<sup>101</sup>, Sok Meng Evelyn Ng<sup>35</sup>, Susanna  
893 Nikolaus<sup>51</sup>, Kaida Ning<sup>35</sup>, Markus Nothen<sup>102</sup>, Ioannis Oikonomou<sup>35</sup>, Orazio Palmieri<sup>44</sup>,  
894 Miles Parkes<sup>24</sup>, Anne Phillips<sup>99</sup>, Cyriel Y Ponsioen<sup>103</sup>, Uršs Potocnik<sup>98,104</sup>, Natalie J  
895 Prescott<sup>25</sup>, Deborah D Proctor<sup>35</sup>, Graham Radford-Smith<sup>57,105</sup>, Jean-Francois Rahier<sup>106</sup>,  
896 Soumya Raychaudhuri<sup>82</sup>, Miguel Regueiro<sup>30</sup>, Florian Rieder<sup>36</sup>, John D Rioux<sup>8,33</sup>, Stephan  
897 Ripke<sup>1,2</sup>, Rebecca Roberts<sup>49</sup>, Richard K Russell<sup>80</sup>, Jeremy D Sanderson<sup>107</sup>, Miquel  
898 Sans<sup>108</sup>, Jack Satsangi<sup>21</sup>, Eric E Schadt<sup>56</sup>, Stefan Schreiber<sup>15,51</sup>, Dominik Schulte<sup>51</sup>, L  
899 Philip Schumm<sup>109</sup>, Regan Scott<sup>30</sup>, Mark Seielstad<sup>110,111</sup>, Yashoda Sharma<sup>35</sup>, Mark S  
900 Silverberg<sup>97</sup>, Lisa A Simms<sup>57</sup>, Jurgita Skieceviciene<sup>84</sup>, Sarah L Spain<sup>25,26</sup>, A. Hillary  
901 Steinhart<sup>97</sup>, Joanne M Stempak<sup>97</sup>, Laura Stronati<sup>112</sup>, Jurgita Sventoraityte<sup>92</sup>, Stephan R  
902 Targan<sup>17</sup>, Kirstin M Taylor<sup>107</sup>, Anje ter Velde<sup>103</sup>, Emilie Theatre<sup>3,4</sup>, Leif Torkvist<sup>113</sup>, Mark  
903 Tremelling<sup>114</sup>, Andrea van der Meulen<sup>115</sup>, Suzanne van Sommeren<sup>27</sup>, Eric Vasiliauskas<sup>17</sup>,  
904 Severine Vermeire<sup>11,28</sup>, Hein W Verspaget<sup>115</sup>, Thomas Walters<sup>75,116</sup>, Kai Wang<sup>47</sup>, Ming-  
905 Hsi Wang<sup>36,50</sup>, Rinse K Weersma<sup>27</sup>, Zhi Wei<sup>117</sup>, David Whiteman<sup>79</sup>, Cisca Wijmenga<sup>71</sup>,  
906 David C Wilson<sup>80,81</sup>, Juliane Winkelmann<sup>118,119</sup>, Ramnik J Xavier<sup>2,29</sup>, Bin Zhang<sup>56</sup>,  
907 Clarence K Zhang<sup>120</sup>, Hu Zhang<sup>121,122</sup>, Wei Zhang<sup>35</sup>, Hongyu Zhao<sup>120</sup>, Zhen Z Zhao<sup>79</sup>  
908 <sup>35</sup>Section of Digestive Diseases, Department of Internal Medicine, Yale School of Medicine, New Haven,  
909 Connecticut, USA. <sup>36</sup>Department of Gastroenterology and Hepatology, Digestive Disease Institute,  
910 Cleveland Clinic, Cleveland, Ohio, USA. <sup>37</sup>Department of Pathobiology, Lerner Research Institute,  
911 Cleveland Clinic, Cleveland, Ohio, USA. <sup>38</sup>Peninsula College of Medicine and Dentistry, Exeter, UK.  
912 <sup>39</sup>Department of Gastroenterology, Erasmus Hospital, Brussels, Belgium. <sup>40</sup>Department of  
913 Gastroenterology, Free University of Brussels, Brussels, Belgium. <sup>41</sup>Division of Medical Sciences, Harvard  
914 Medical School, Boston, Massachusetts, USA. <sup>42</sup>Institute of Regional Health Research, University of  
915 Southern Denmark, Odense, Denmark. <sup>43</sup>Inflammatory Bowel Disease Service, Department of  
916 Gastroenterology and Hepatology, Royal Adelaide Hospital, Adelaide, Australia. <sup>44</sup>Unit of  
917 Gastroenterology, Istituto di Ricovero e Cura a Carattere Scientifico-Casa Sollievo della Sofferenza  
918 (IRCCS-CSS) Hospital, San Giovanni Rotondo, Italy. <sup>45</sup>Strutture Organizzative Dipartimentali (SOD)  
919 Gastroenterologia 2, Azienda Ospedaliero Universitaria (AOU) Careggi, Florence, Italy. <sup>46</sup>Department of  
920 Gastroenterology, Hopital Maisonneuve-Rosemont, Montréal, Québec, Canada. <sup>47</sup>Center for Applied  
921 Genomics, The Children's Hospital of Philadelphia, Philadelphia, Pennsylvania, USA. <sup>48</sup>Department of  
922 Gastroenterology and Hepatology, Flinders Medical Centre and School of Medicine, Flinders University,  
923 Adelaide, Australia. <sup>49</sup>Department of Medicine, University of Otago, Christchurch, New Zealand.  
924 <sup>50</sup>Meyerhoff Inflammatory Bowel Disease Center, Department of medicine, Johns Hopkins University  
925 School of Medicine, Baltimore, Maryland, USA. <sup>51</sup>Department for General Internal Medicine, Christian-  
926 Albrechts-University, Kiel, Germany. <sup>52</sup>Division of Gastroenterology, Royal Victoria Hospital, Montréal,  
927 Québec, Canada. <sup>53</sup>Department of Medicine II, Ludwig-Maximilians-University Hospital Munich-  
928 Grosshadern, Munich, Germany. <sup>54</sup>Department of Gastroenterology, Campus Charité Mitte,  
929 Universitätsmedizin Berlin, Berlin, Germany. <sup>55</sup>IBD unit, Fremantle Hospital, Fremantle, Australia.  
930 <sup>56</sup>Department of Genetics and Genomic Sciences, Mount Sinai School of Medicine, New York, New York,  
931 USA. <sup>57</sup>Inflammatory Bowel Diseases, Genetics and Computational Biology, Queensland Institute of  
932 Medical Research, Brisbane, Australia. <sup>58</sup>IBD Center, Department of Gastroenterology, Istituto Clinico  
933 Humanitas, Milan, Italy. <sup>59</sup>Department of Gastroenterology and Hepatology, Radboud University Nijmegen  
934 Medical Centre, Nijmegen, The Netherlands. <sup>60</sup>Department of Hepatology and Gastroenterology, Ghent  
935 University Hospital, Ghent, Belgium. <sup>61</sup>Center of hepatology, Gastroenterology and Dietetics, Vilnius  
936 University, Vilnius, Lithuania. <sup>62</sup>Pediatric Gastroenterology, Cincinnati Children's Hospital Medical  
937 Center, Cincinnati, Ohio, USA. <sup>63</sup>Department of Gastroenterology, Université Catholique de Louvain  
938 (UCL) Cliniques Universitaires Saint-Luc, Brussels, Belgium. <sup>64</sup>Division of Gastroenterology, University  
939 Hospital Padua, Padua, Italy. <sup>65</sup>Department of Pediatrics, Cedars Sinai Medical Center, Los Angeles,  
940 California, USA. <sup>66</sup>Department of Gastroenterology, Torbay Hospital, Torbay, Devon, UK. <sup>67</sup>Center for  
941 Human Genetic Research, Massachusetts General Hospital, Harvard Medical School, Boston,  
942 Massachusetts, USA. <sup>68</sup>Pediatrics, Harvard Medical School, Boston, Massachusetts, USA. <sup>69</sup>Faculty of

943 Medical & Health Sciences, School of Medical Sciences, The University of Auckland, Auckland, New  
944 Zealand. <sup>70</sup>Department of Gastroenterology, Mater Health Services, Brisbane, Australia. <sup>71</sup>Department of  
945 Genetics, University Medical Center Groningen, Groningen, The Netherlands. <sup>72</sup>Department of  
946 Gastroenterology, Christchurch Hospital, Christchurch, New Zealand. <sup>73</sup>Institute of Genetic Epidemiology,  
947 Helmholtz Zentrum München - German Research Center for Environmental Health, Neuherberg,  
948 Germany. <sup>74</sup>Department of Preventive Dentistry and Periodontology, Ludwig-Maximilians-University  
949 Hospital Munich-Grosshadern, Munich, Germany. <sup>75</sup>Division of Pediatric Gastroenterology, Hepatology  
950 and Nutrition, Hospital for Sick Children, Toronto, Ontario, Canada. <sup>76</sup>Department of Pediatrics, University  
951 of Utah School of Medicine, Salt Lake City, Utah, USA. <sup>77</sup>Department of Medicine, St Mark's Hospital,  
952 Harrow, Middlesex, UK. <sup>78</sup>Nottingham Digestive Diseases Centre, Queens Medical Centre, Nottingham,  
953 UK. <sup>79</sup>Molecular Epidemiology, Genetics and Computational Biology, Queensland Institute of Medical  
954 Research, Brisbane, Australia. <sup>80</sup>Paediatric Gastroenterology and Nutrition, Royal Hospital for Sick  
955 Children, Edinburgh, UK. <sup>81</sup>Child Life and Health, University of Edinburgh, Edinburgh, Scotland, UK.  
956 <sup>82</sup>Division of Rheumatology Immunology and Allergy, Brigham and Women's Hospital, Boston,  
957 Massachusetts, USA. <sup>83</sup>Université Paris Diderot, Sorbonne Paris-Cité, Paris, France. <sup>84</sup>Academy of  
958 Medicine, Lithuanian University of Health Sciences, Kaunas, Lithuania. <sup>85</sup>Research Institute of Internal  
959 Medicine, Department of Transplantation Medicine, Division of Cancer, Surgery and Transplantation, Oslo  
960 University Hospital Rikshospitalet, Oslo, Norway. <sup>86</sup>Norwegian PSC Research Center, Department of  
961 Transplantation Medicine, Division of Cancer, Surgery and Transplantation, Oslo University Hospital  
962 Rikshospitalet, Oslo, Norway. <sup>87</sup>K.G. Jebsen Inflammation Research Centre, Institute of Clinical Medicine,  
963 University of Oslo, Oslo, Norway. <sup>88</sup>Genetic Medicine, Manchester Academic Health Science Centre,  
964 Manchester, UK. <sup>89</sup>The Manchester Centre for Genomic Medicine, University of Manchester, Manchester,  
965 UK. <sup>90</sup>QIMR Berghofer Medical Research Institute, Royal Brisbane Hospital, Brisbane, Australia.  
966 <sup>91</sup>Department of Pediatrics, Emory University School of Medicine, Atlanta, Georgia, USA. <sup>92</sup>Department of  
967 Gastroenterology, Kaunas University of Medicine, Kaunas, Lithuania. <sup>93</sup>Faculty of medicine, University of  
968 Latvia, Riga, Latvia. <sup>94</sup>Dipartimento di Neuroscienze, Psicologia, Area del Farmaco e Salute del Bambino  
969 (NEUROFARBA), Università di Firenze Strutture Organizzative Dipartimentali (SOD) Gastroenterologia e  
970 Nutrizione Ospedale pediatrico Meyer, Firenze, Italy. <sup>95</sup>Department of Gastroenterology, The Townsville  
971 Hospital, Townsville, Australia. <sup>96</sup>Institute of Human Genetics, Newcastle University, Newcastle upon  
972 Tyne, UK. <sup>97</sup>Inflammatory Bowel Disease Centre, Mount Sinai Hospital, Toronto, Ontario, Canada.  
973 <sup>98</sup>Center for Human Molecular Genetics and Pharmacogenomics, Faculty of Medicine, University of  
974 Maribor, Maribor, Slovenia. <sup>99</sup>Department of Medicine, Ninewells Hospital and Medical School, Dundee,  
975 UK. <sup>100</sup>Center for Computational and Integrative Biology, Massachusetts General Hospital, Harvard  
976 Medical School, Boston, Massachusetts, USA. <sup>101</sup>Department of Medicine and Therapeutics, Institute of  
977 Digestive Disease, Chinese University of Hong Kong, Hong Kong. <sup>102</sup>Department of Genomics Life &  
978 Brain Center, University Hospital Bonn, Bonn, Germany. <sup>103</sup>Department of Gastroenterology, Academic  
979 Medical Center, Amsterdam, The Netherlands. <sup>104</sup>Faculty for Chemistry and Chemical Engineering,  
980 University of Maribor, Maribor, Slovenia. <sup>105</sup>Department of Gastroenterology, Royal Brisbane and  
981 Womens Hospital, Brisbane, Australia. <sup>106</sup>Department of Gastroenterology, Université Catholique de  
982 Louvain (UCL) Centre Hospitalier Universitaire (CHU) Mont-Godinne, Mont-Godinne, Belgium.  
983 <sup>107</sup>Department of Gastroenterology, Guy's & St Thomas' NHS Foundation Trust, St-Thomas Hospital,  
984 London, UK. <sup>108</sup>Department of Digestive Diseases, Hospital Quiron Teknon, Barcelona, Spain.  
985 <sup>109</sup>Department of Public Health Sciences, University of Chicago, Chicago, Illinois, USA. <sup>110</sup>Human  
986 Genetics, Genome Institute of Singapore, Singapore. <sup>111</sup>Institute for Human Genetics, University of  
987 California, San Francisco, San Francisco, California, USA. <sup>112</sup>Department of Biology of Radiations and  
988 Human Health, Agenzia nazionale per le nuove tecnologie l'energia e lo sviluppo economico sostenibile  
989 (ENEA), Rome, Italy. <sup>113</sup>Department of Clinical Science Intervention and Technology, Karolinska  
990 Institutet, Stockholm, Sweden. <sup>114</sup>Gastroenterology & General Medicine, Norfolk and Norwich University  
991 Hospital, Norwich, UK. <sup>115</sup>Department of Gastroenterology, Leiden University Medical Center, Leiden,  
992 The Netherlands. <sup>116</sup>Faculty of medicine, University of Toronto, Toronto, Ontario, Canada. <sup>117</sup>Department  
993 of Computer Science, New Jersey Institute of Technology, Newark, New Jersey, USA. <sup>118</sup>Institute of  
994 Human Genetics, Technische Universität München, Munich, Germany. <sup>119</sup>Department of Neurology,  
995 Technische Universität München, Munich, Germany. <sup>120</sup>Department of Biostatistics, School of Public  
996 Health, Yale University, New Haven, Connecticut, USA. <sup>121</sup>Department of Gastroenterology, West China  
997 Hospital, Chengdu, Sichuan, China. <sup>122</sup>State Key Laboratory of Biotherapy, Sichuan University West China  
998 University of Medical Sciences (WCUMS), Chengdu, Sichuan, China

Figure 1  
a

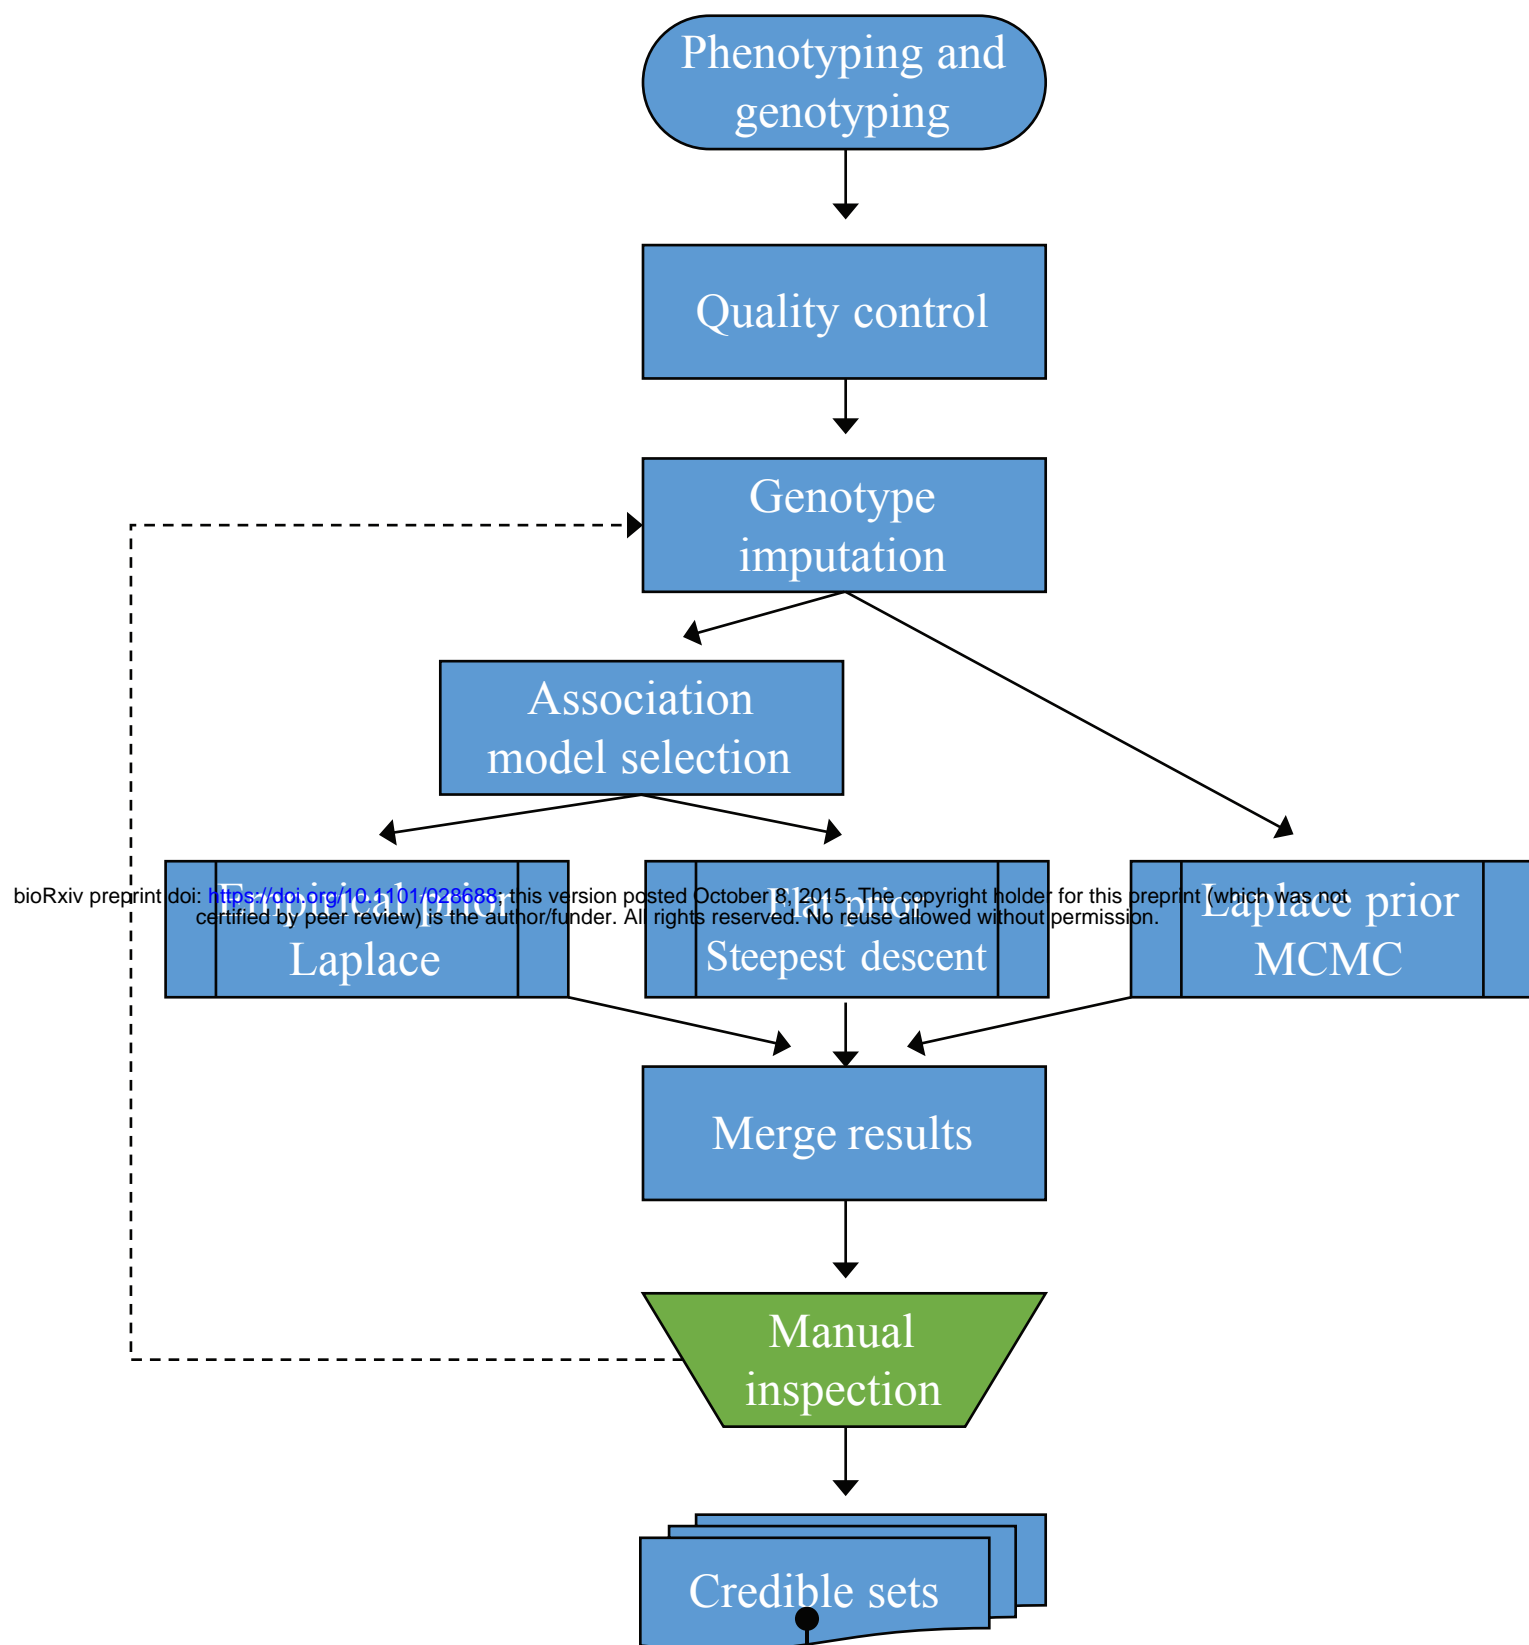

b

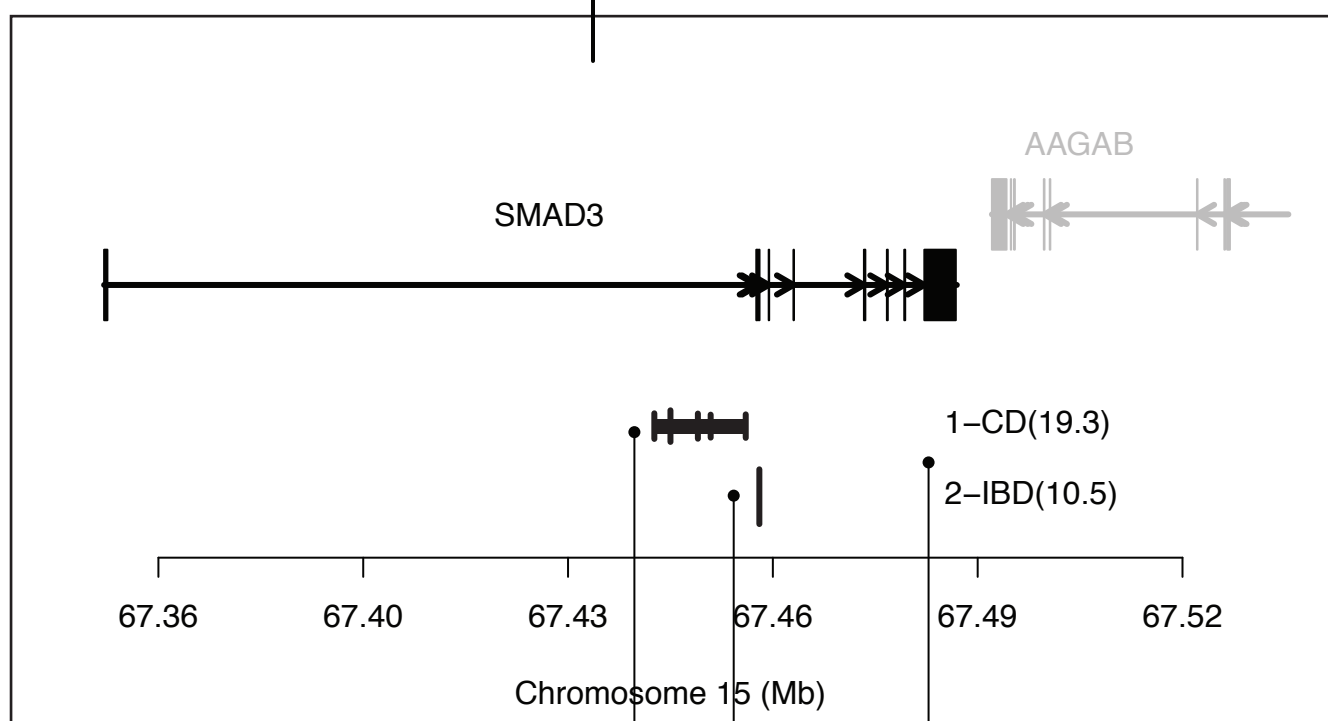

**Signal 1 fine-mapped to 5 variants spanning 13.88kb**

| variant    | size | position | AF    | Probability | TFBS | Epigenetic  |
|------------|------|----------|-------|-------------|------|-------------|
| rs17293632 | 5    | 67442596 | 0.245 | 0.400       | API  |             |
| rs72743461 | 5    | 67441750 | 0.246 | 0.191       |      |             |
| rs56375023 | 5    | 67448363 | 0.245 | 0.173       |      |             |
| rs56062135 | 5    | 67455630 | 0.245 | 0.104       |      |             |
| rs17228058 | 5    | 67450305 | 0.245 | 0.082       |      | Gut_H3K27ac |

Posterior probability of the variants.  
(sum of the probabilities  $\geq$  95%)

Functional annotation

**This region has been mapped to two independent signals. Phenotype and  $-\log_{10}(P\text{-val})$  reported for each signal**

**Signal 2 fine-mapped to a single coding variant with 99% probability: rs35874463 [SMAD3-I170V]**

Figure 2

a

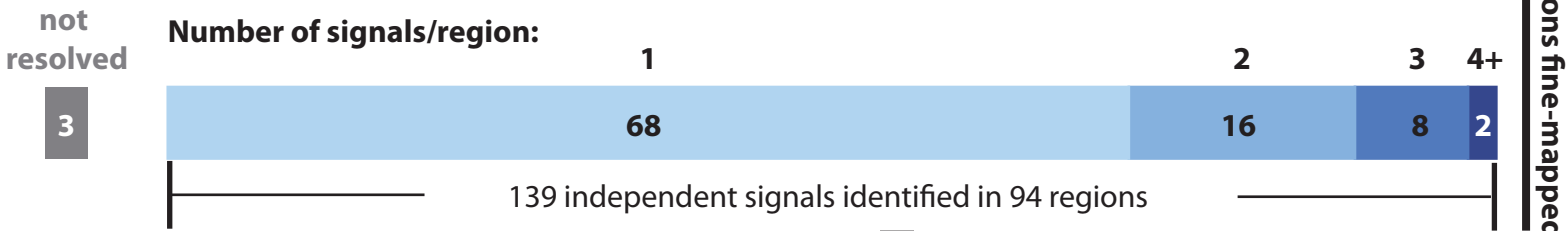

b

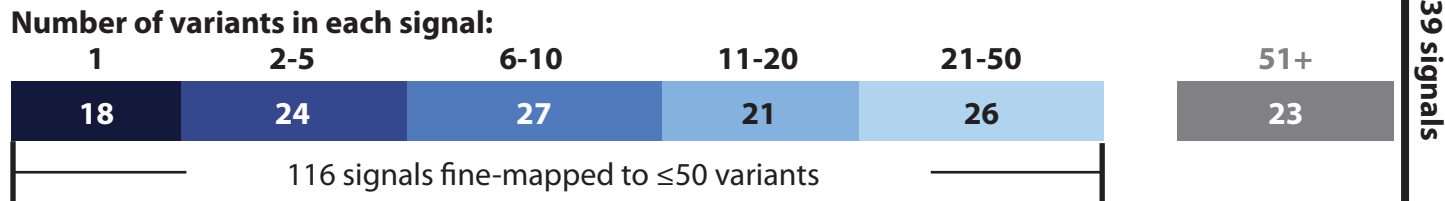

c

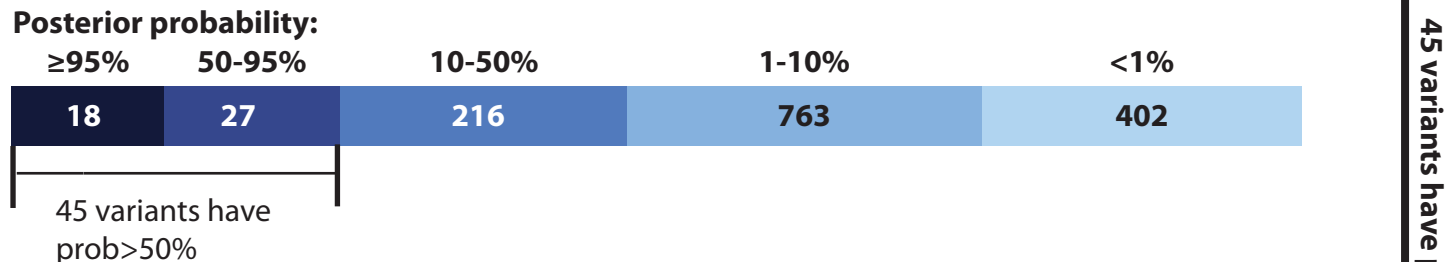



# Figure 3

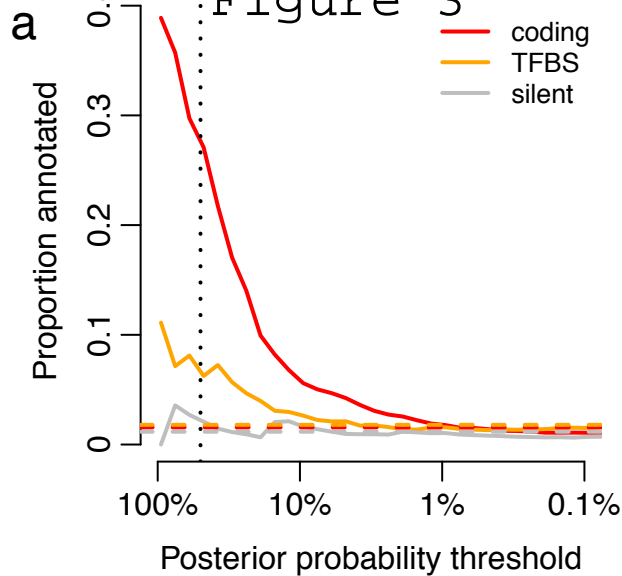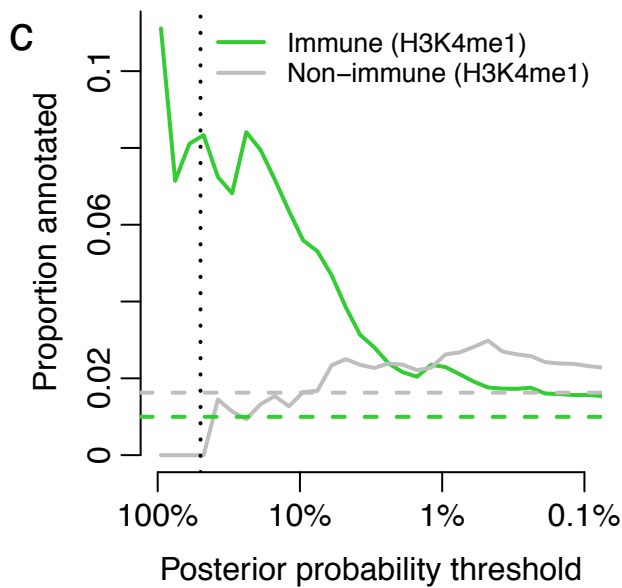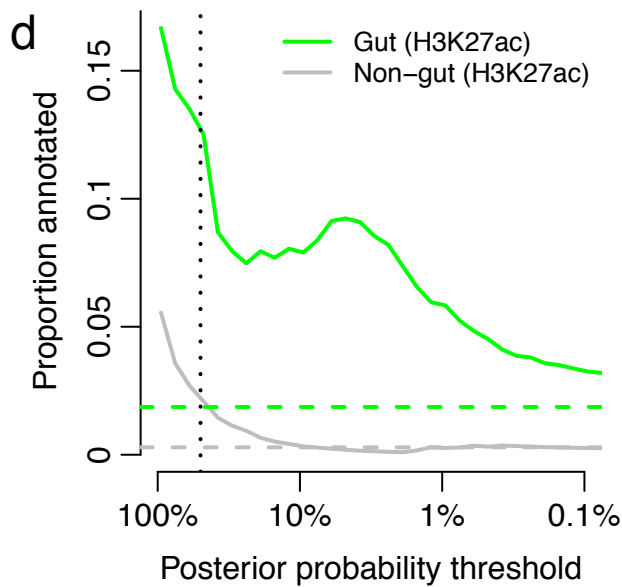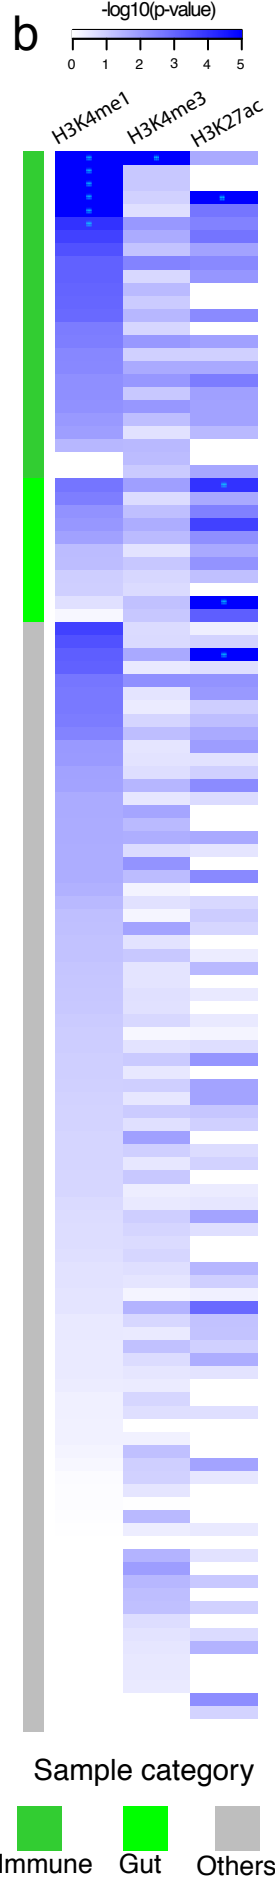

Figure 4

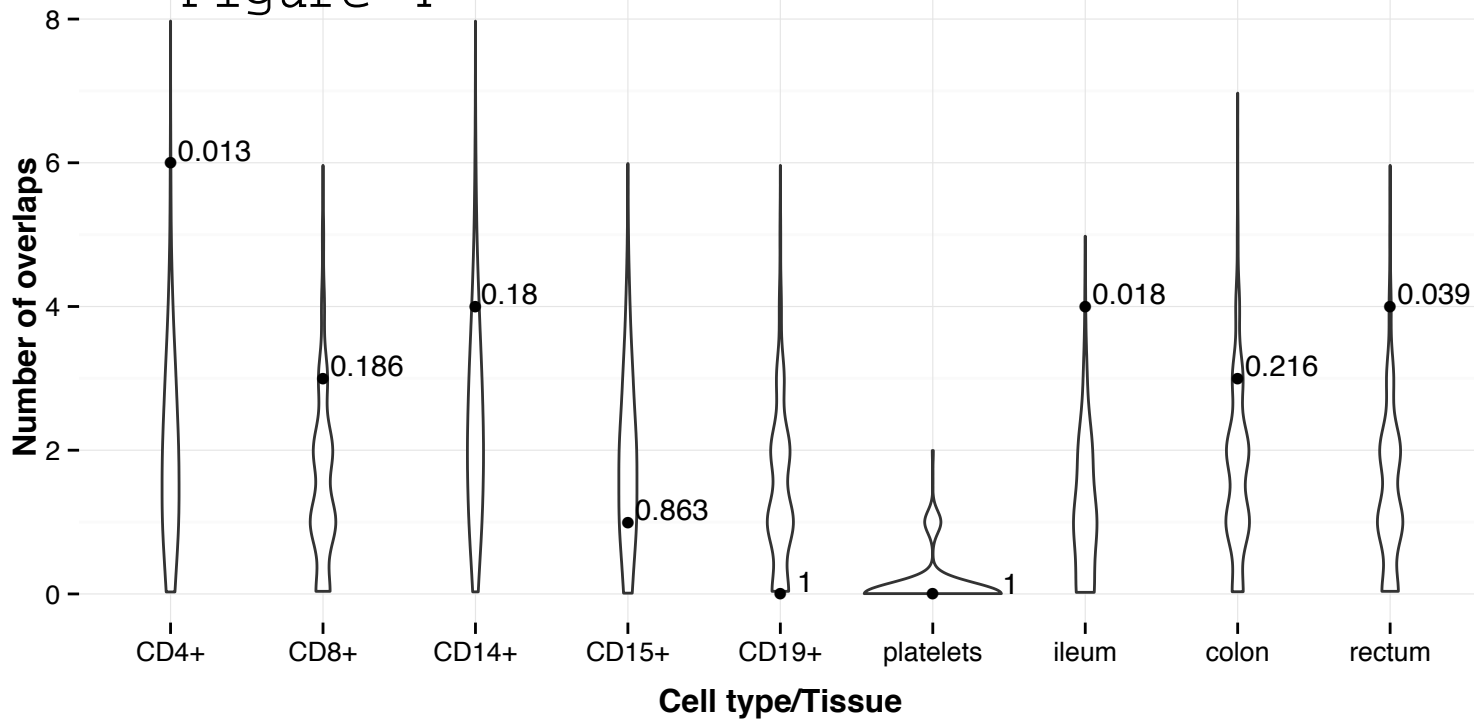

Figure 5 correlation coefficient (r): 0.52

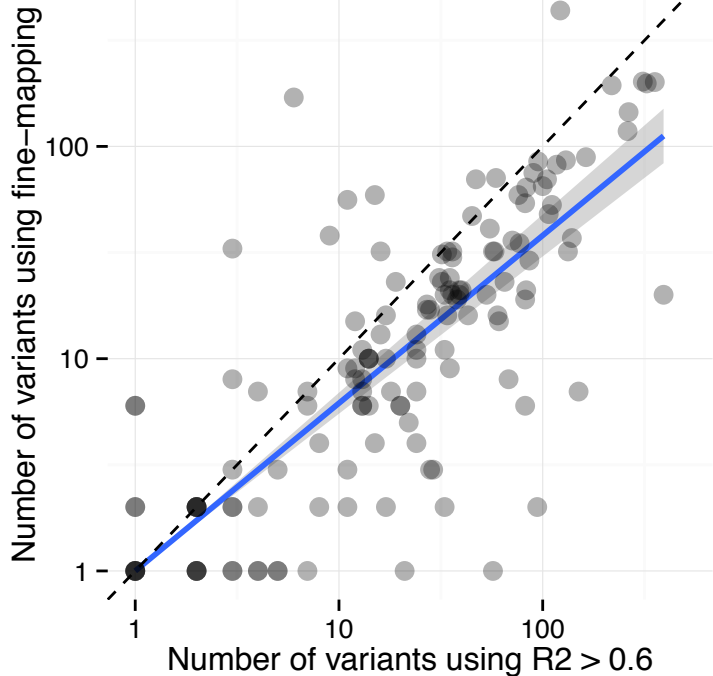

Extended Data Figure 1

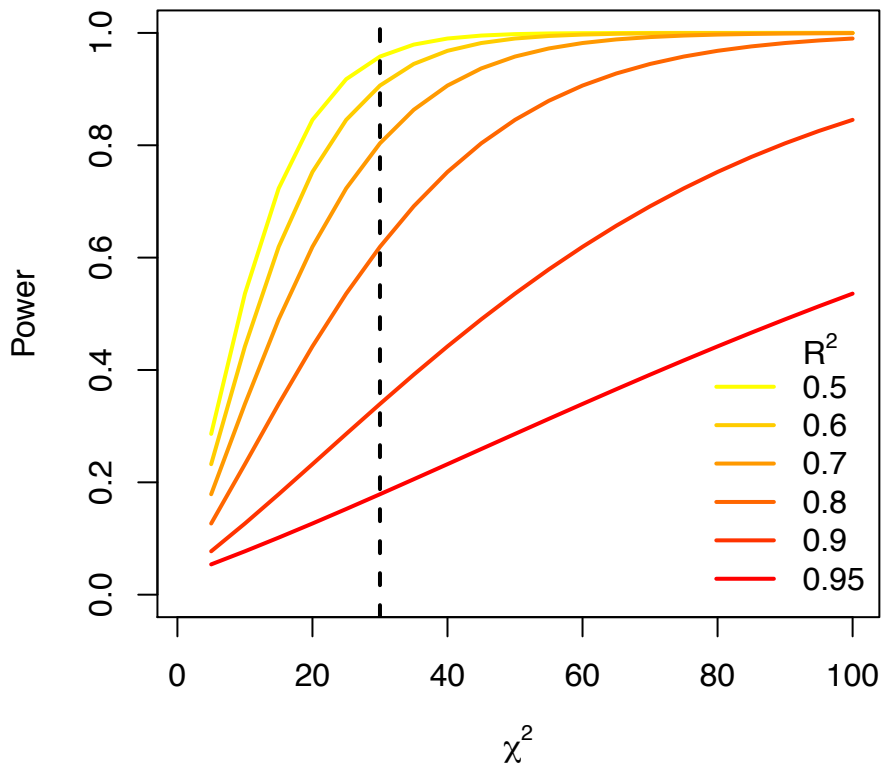

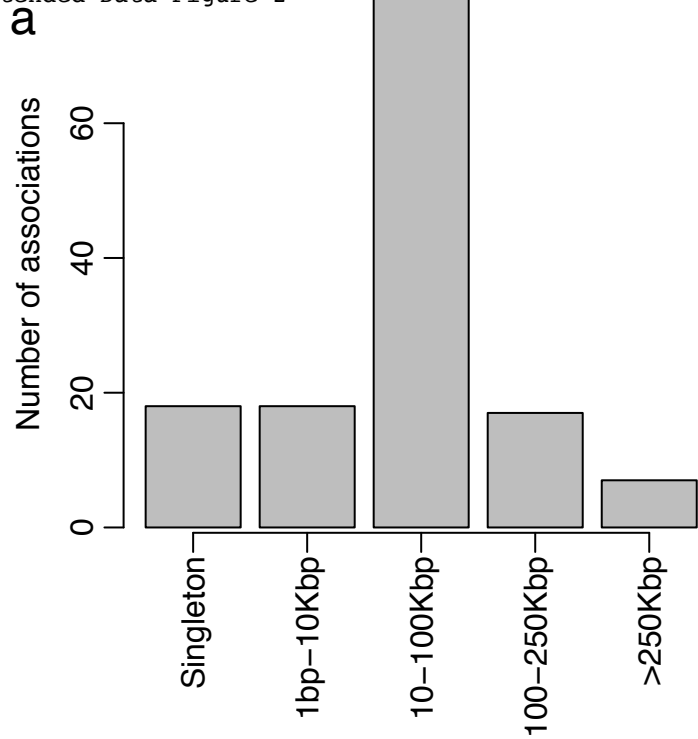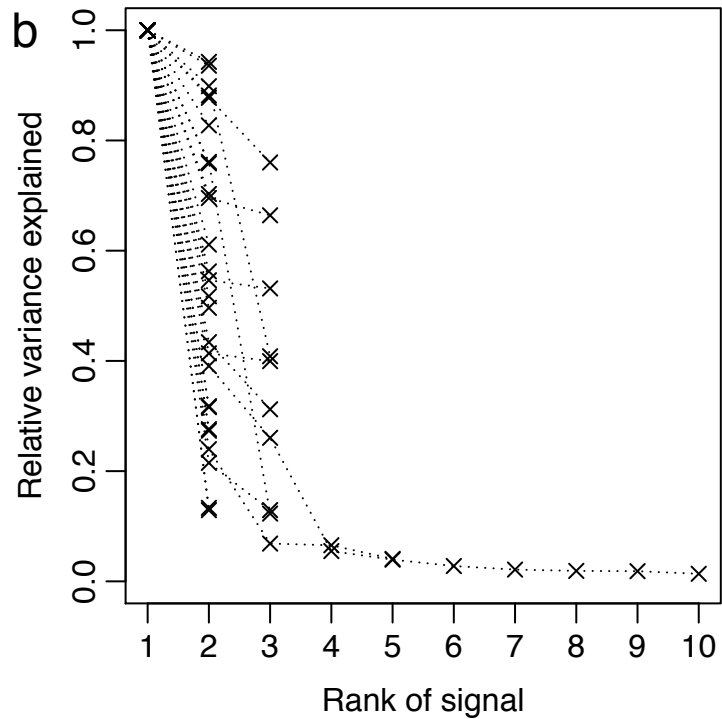

### a) Functional annotation for 45 variants having posterior probability > 50%

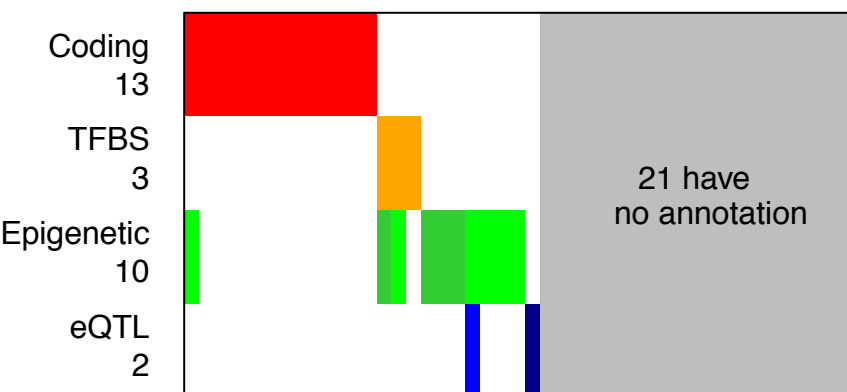

### b) Functional annotation for 116 associations that are mapped to < 50 variants

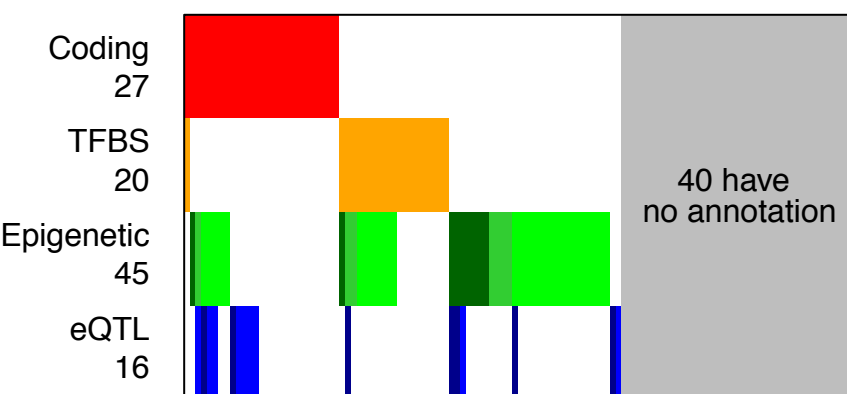

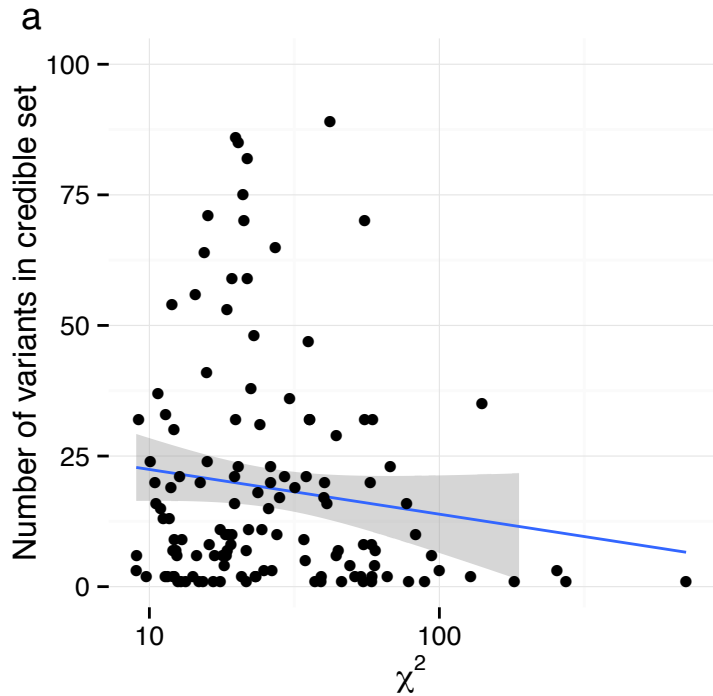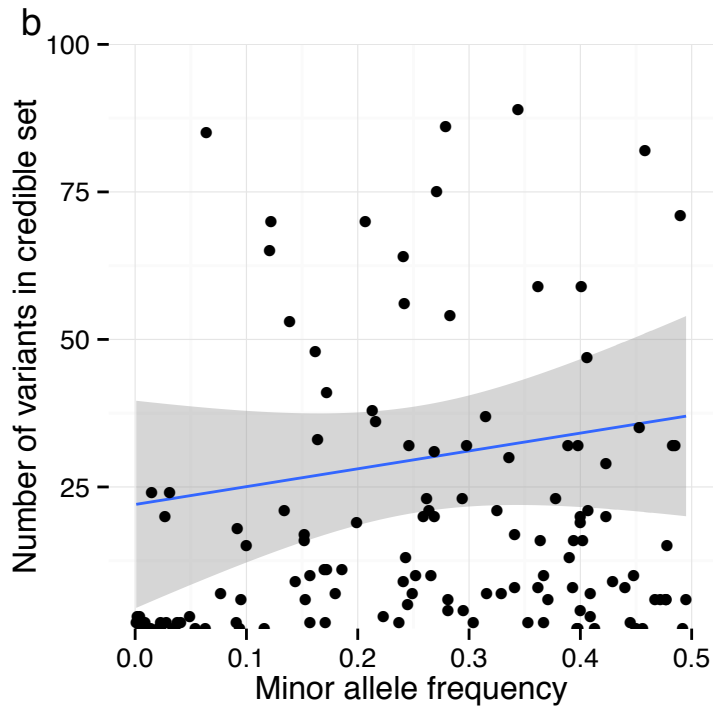

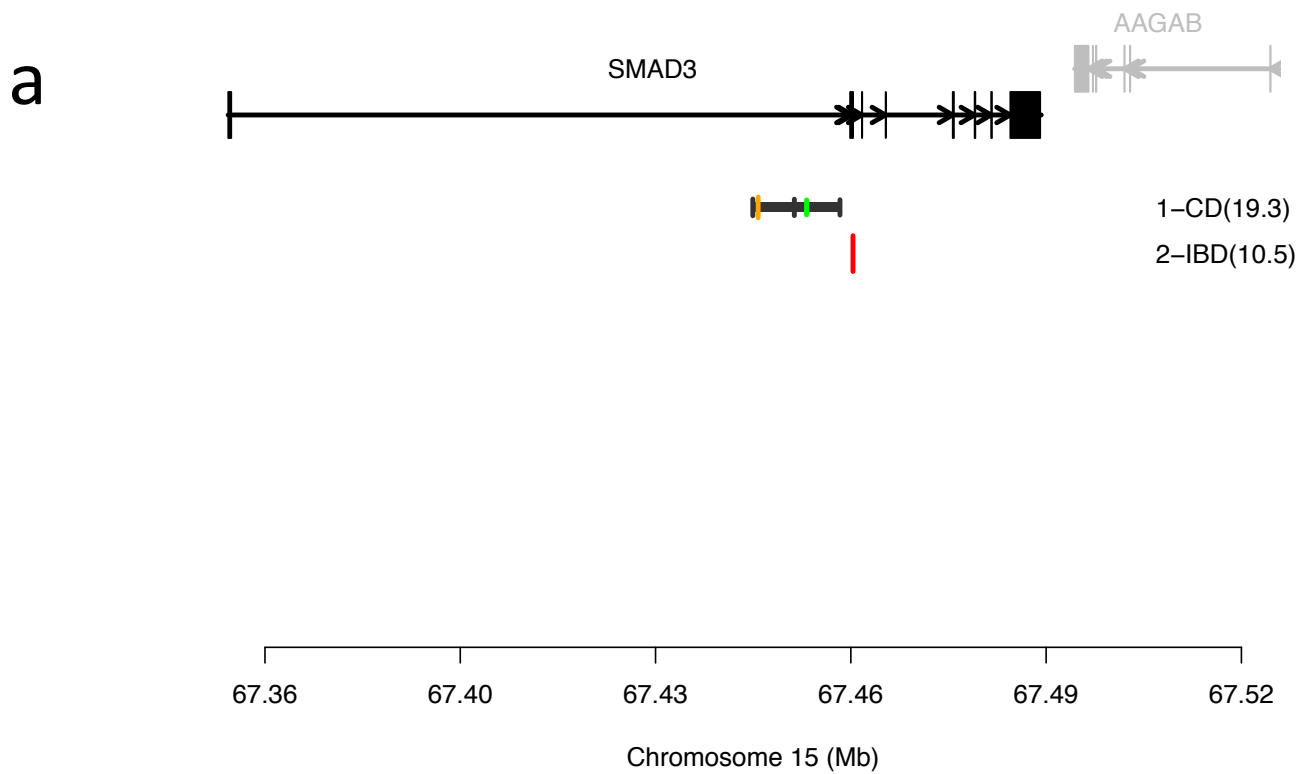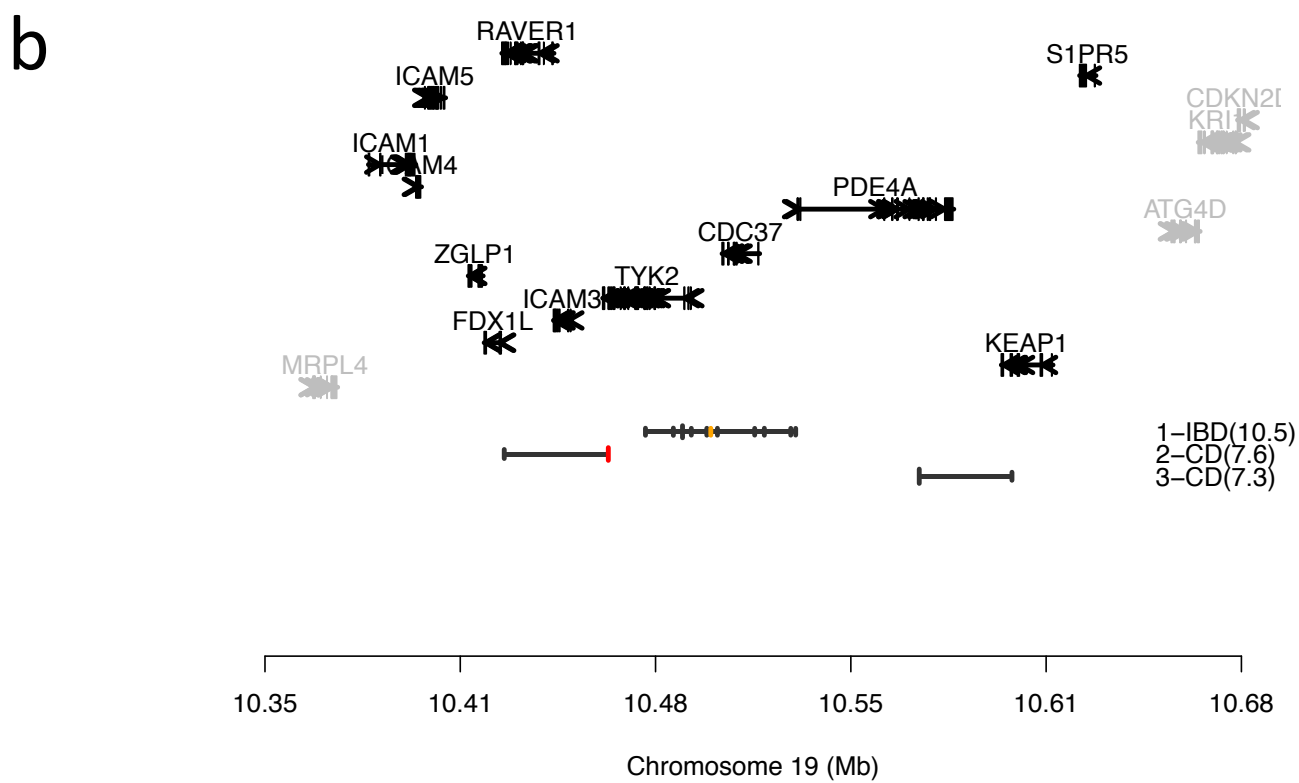





| <b>dataset</b>          | <b>method</b>      | <b>observed</b> | <b>Expected</b> | <b>p-value</b> |
|-------------------------|--------------------|-----------------|-----------------|----------------|
| <b>CD4</b>              | <b>Naïve</b>       | <b>3</b>        | <b>0.4</b>      | <b>0.007</b>   |
| CD8                     | Naïve              | 1               | 0.3             | 0.296          |
| CD14                    | Naïve              | 0               | 0.2             | 1.000          |
| CD15                    | Naïve              | 1               | 0.2             | 0.199          |
| CD19                    | Naïve              | 0               | 0.1             | 1.000          |
| platelets               | Naïve              | 0               | 0.0             | 1.000          |
| <b>ileum</b>            | <b>Naïve</b>       | <b>2</b>        | <b>0.3</b>      | <b>0.025</b>   |
| colon                   | Naïve              | 1               | 0.2             | 0.206          |
| rectum                  | Naïve              | 1               | 0.2             | 0.187          |
| <b>CD14 naïve</b>       | <b>Naïve</b>       | <b>8</b>        | <b>2.7</b>      | <b>0.005</b>   |
| CD14 IFN stimulated     | Naïve              | 4               | 3.2             | 0.559          |
| CD14 LPS 2h stimulated  | Naïve              | 1               | 2.1             | 0.726          |
| CD14 LPS 24h stimulated | Naïve              | 5               | 2.5             | 0.107          |
| <b>CD4</b>              | <b>Bayesian</b>    | <b>4</b>        | <b>1.0</b>      | <b>0.010</b>   |
| CD8                     | Bayesian           | 1               | 0.8             | 0.566          |
| CD14                    | Bayesian           | 1               | 0.9             | 0.595          |
| CD15                    | Bayesian           | 0               | 0.7             | 1.000          |
| CD19                    | Bayesian           | 0               | 0.6             | 1.000          |
| platelets               | Bayesian           | 0               | 0.1             | 1.000          |
| ileum                   | Bayesian           | 2               | 0.4             | 0.069          |
| <b>colon</b>            | <b>Bayesian</b>    | <b>3</b>        | <b>0.8</b>      | <b>0.040</b>   |
| rectum                  | Bayesian           | 2               | 0.6             | 0.124          |
| <b>CD4</b>              | <b>Permutation</b> | <b>6</b>        | <b>1.9</b>      | <b>0.013</b>   |
| CD8                     | Permutation        | 3               | 1.5             | 0.186          |
| CD14                    | Permutation        | 4               | 2.3             | 0.180          |
| CD15                    | Permutation        | 1               | 1.8             | 0.863          |
| CD19                    | Permutation        | 0               | 1.4             | 1.000          |
| platelets               | Permutation        | 0               | 0.1             | 1.000          |
| <b>ileum</b>            | <b>Permutation</b> | <b>4</b>        | <b>1.1</b>      | <b>0.018</b>   |
| colon                   | Permutation        | 3               | 1.7             | 0.216          |
| <b>rectum</b>           | <b>Permutation</b> | <b>4</b>        | <b>1.4</b>      | <b>0.039</b>   |
